# Supplementary material for: A personalized medicine approach identifies enasidenib as an efficient treatment for IDH2 mutant chondrosarcoma
Source: PubMed Central journal article supplement — eBioMedicine. 2024 Mar 27;102:105090. doi: 10.1016/j.ebiom.2024.105090 (PMC10990714; doi:10.1016/j.ebiom.2024.105090), 2024-03-27

**SARC20**

| alleles | TUMOR | CELL LINE |
|---------|-------|-----------|
| D7S820  | 9,12  | 9,13      |
| CSF1PO  | 11,11 | 11,11     |
| TH01    | 6,9.3 | 6,9.3     |
| D13S317 | 9,11  | 9,11      |
| D16S539 | 11,11 | 11,11     |
| VWA     | 17,17 | 17,17     |
| TPOX    | 8,8   | 8,8       |
| AM      | x,y   | x,y       |
| DS5818  | 10,12 | 10,12     |

**SARC06**

| TUMOR | CELL LINE |
|-------|-----------|
| 8,10  | 8,10      |
| 12,13 | 12,13     |
| 6,9   | 6,9       |
| 12,12 | 12,12     |
| 10,11 | 10,11     |
| 16,17 | 16,17     |
| 8,11  | 8,11      |
| X,Y   | X,Y       |
| 12,12 | 12,12     |

**SYN01**

| TUMOR | CELL LINE |
|-------|-----------|
| 9,10  | 9,10      |
| 10,11 | 10,10     |
| 9,9.3 | 9,9.3     |
| 8,12  | 8,12      |
| 11,12 | 11,12     |
| 14,14 | 14,14     |
| 8,8   | 8,8       |
| X,Y   | X,Y       |
| 11,11 | 11,11     |

**CDS17 / T-CDS17**

| alleles | TUMOR | PRIMARY CELL LINE | XENOGRAFT CELL LINE |
|---------|-------|-------------------|---------------------|
| D7S820  | 9,10  | 9,10              | 9,10                |
| CSF1PO  | 11,11 | 11,11             | 11,11               |
| TH01    | 6,7   | 6,7               | 6,7                 |
| D13S317 | 12,12 | 12,12             | 12,12               |
| D16S539 | 11,11 | 11,11             | 11,11               |
| VWA     | 14,16 | 14,16             | 14,16               |
| TPOX    | 9,9   | 9,9               | 9,9                 |
| AM      | X,Y   | X,Y               | X,Y                 |
| DS5818  | 11,13 | 13,13             | 11,13               |

**CDS11**

| TUMOR | CELL LINE |
|-------|-----------|
| 11,12 | 11,12     |
| 11,11 | 11,11     |
| 6,9.3 | 6,9.3     |
| 11,12 | 11,12     |
| 9,12  | 9,12      |
| 15,15 | 15,15     |
| 9,11  | 9,11      |
| X,X   | X,X       |
| 11,12 | 11,12     |

**CDS23**

| TUMOR | CELL LINE |
|-------|-----------|
| 11,12 | 11,12     |
| 11,12 | 11,12     |
| 9,9.3 | 6,9,9.3   |
| 11,11 | 11,11     |
| 9,11  | 9,11      |
| 15,15 | 15,16     |
| 8,11  | 8,11      |
| X,Y   | X,Y       |
| 11,13 | 11,13     |

**SW1353**

| <b>alleles</b> | <b>CELL LINE</b> |
|----------------|------------------|
| D7S820         | 9,11             |
| CSF1PO         | 12,12            |
| TH01           | 6,9              |
| D13S317        | 12,13            |
| D16S539        | 11,12            |
| VWA            | 16,17            |
| TPOX           | 8,11             |
| AM             | x,x              |
| DS5818         | 10,11            |

**L2975**

| <b>alleles</b> | <b>CELL LINE</b> |
|----------------|------------------|
| D7S820         | 9,11             |
| CSF1PO         | 13,13            |
| TH01           | 7,7              |
| D13S317        | 12,12            |
| D16S539        | 11,12            |
| VWA            | 14,14            |
| TPOX           | 8,8              |
| AM             | x,y              |
| DS5818         | 12,12            |

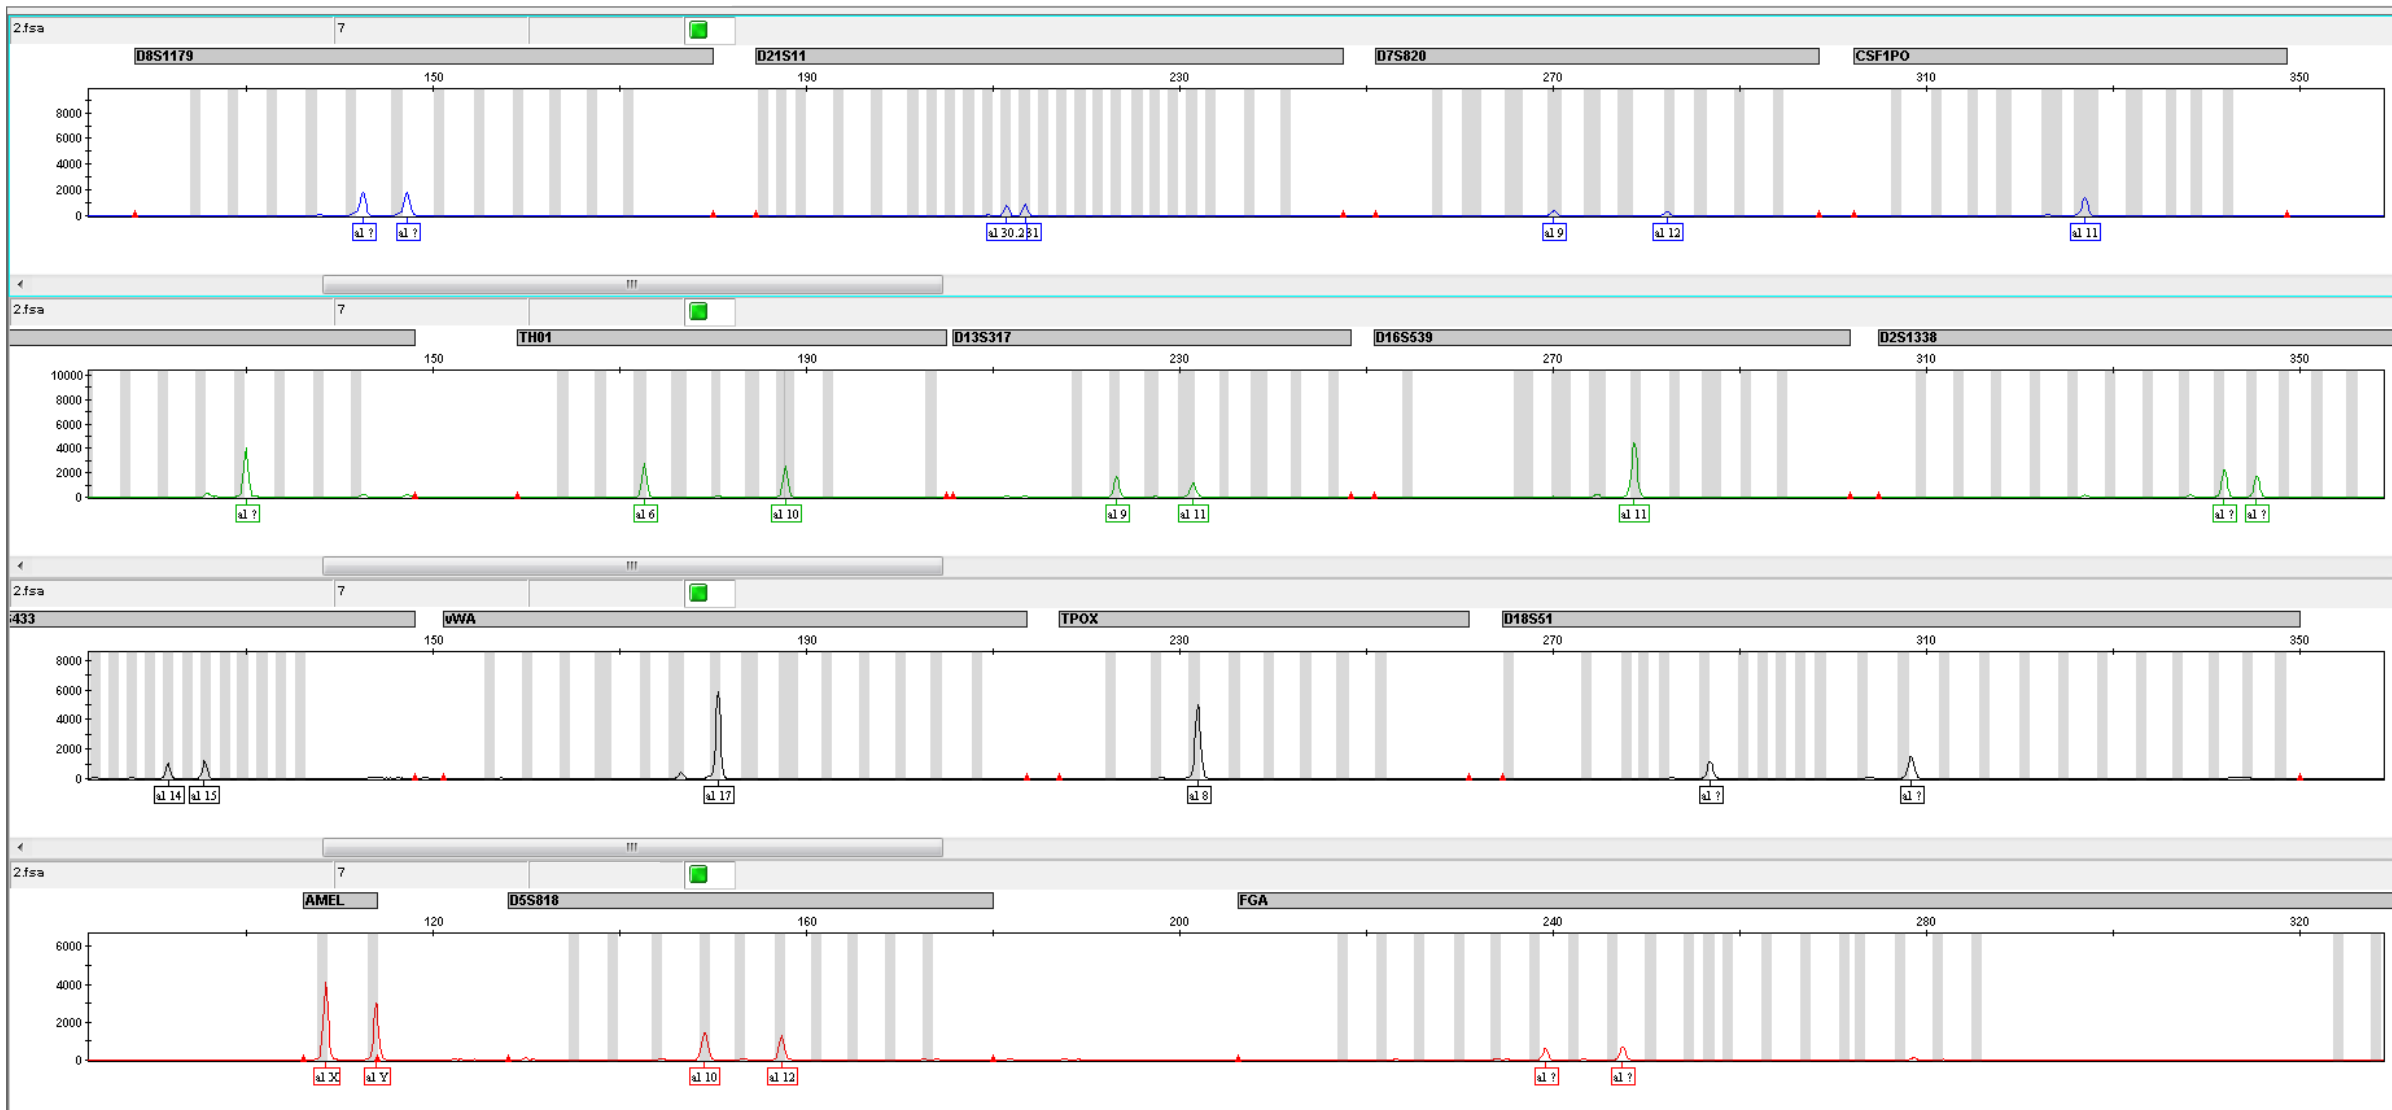

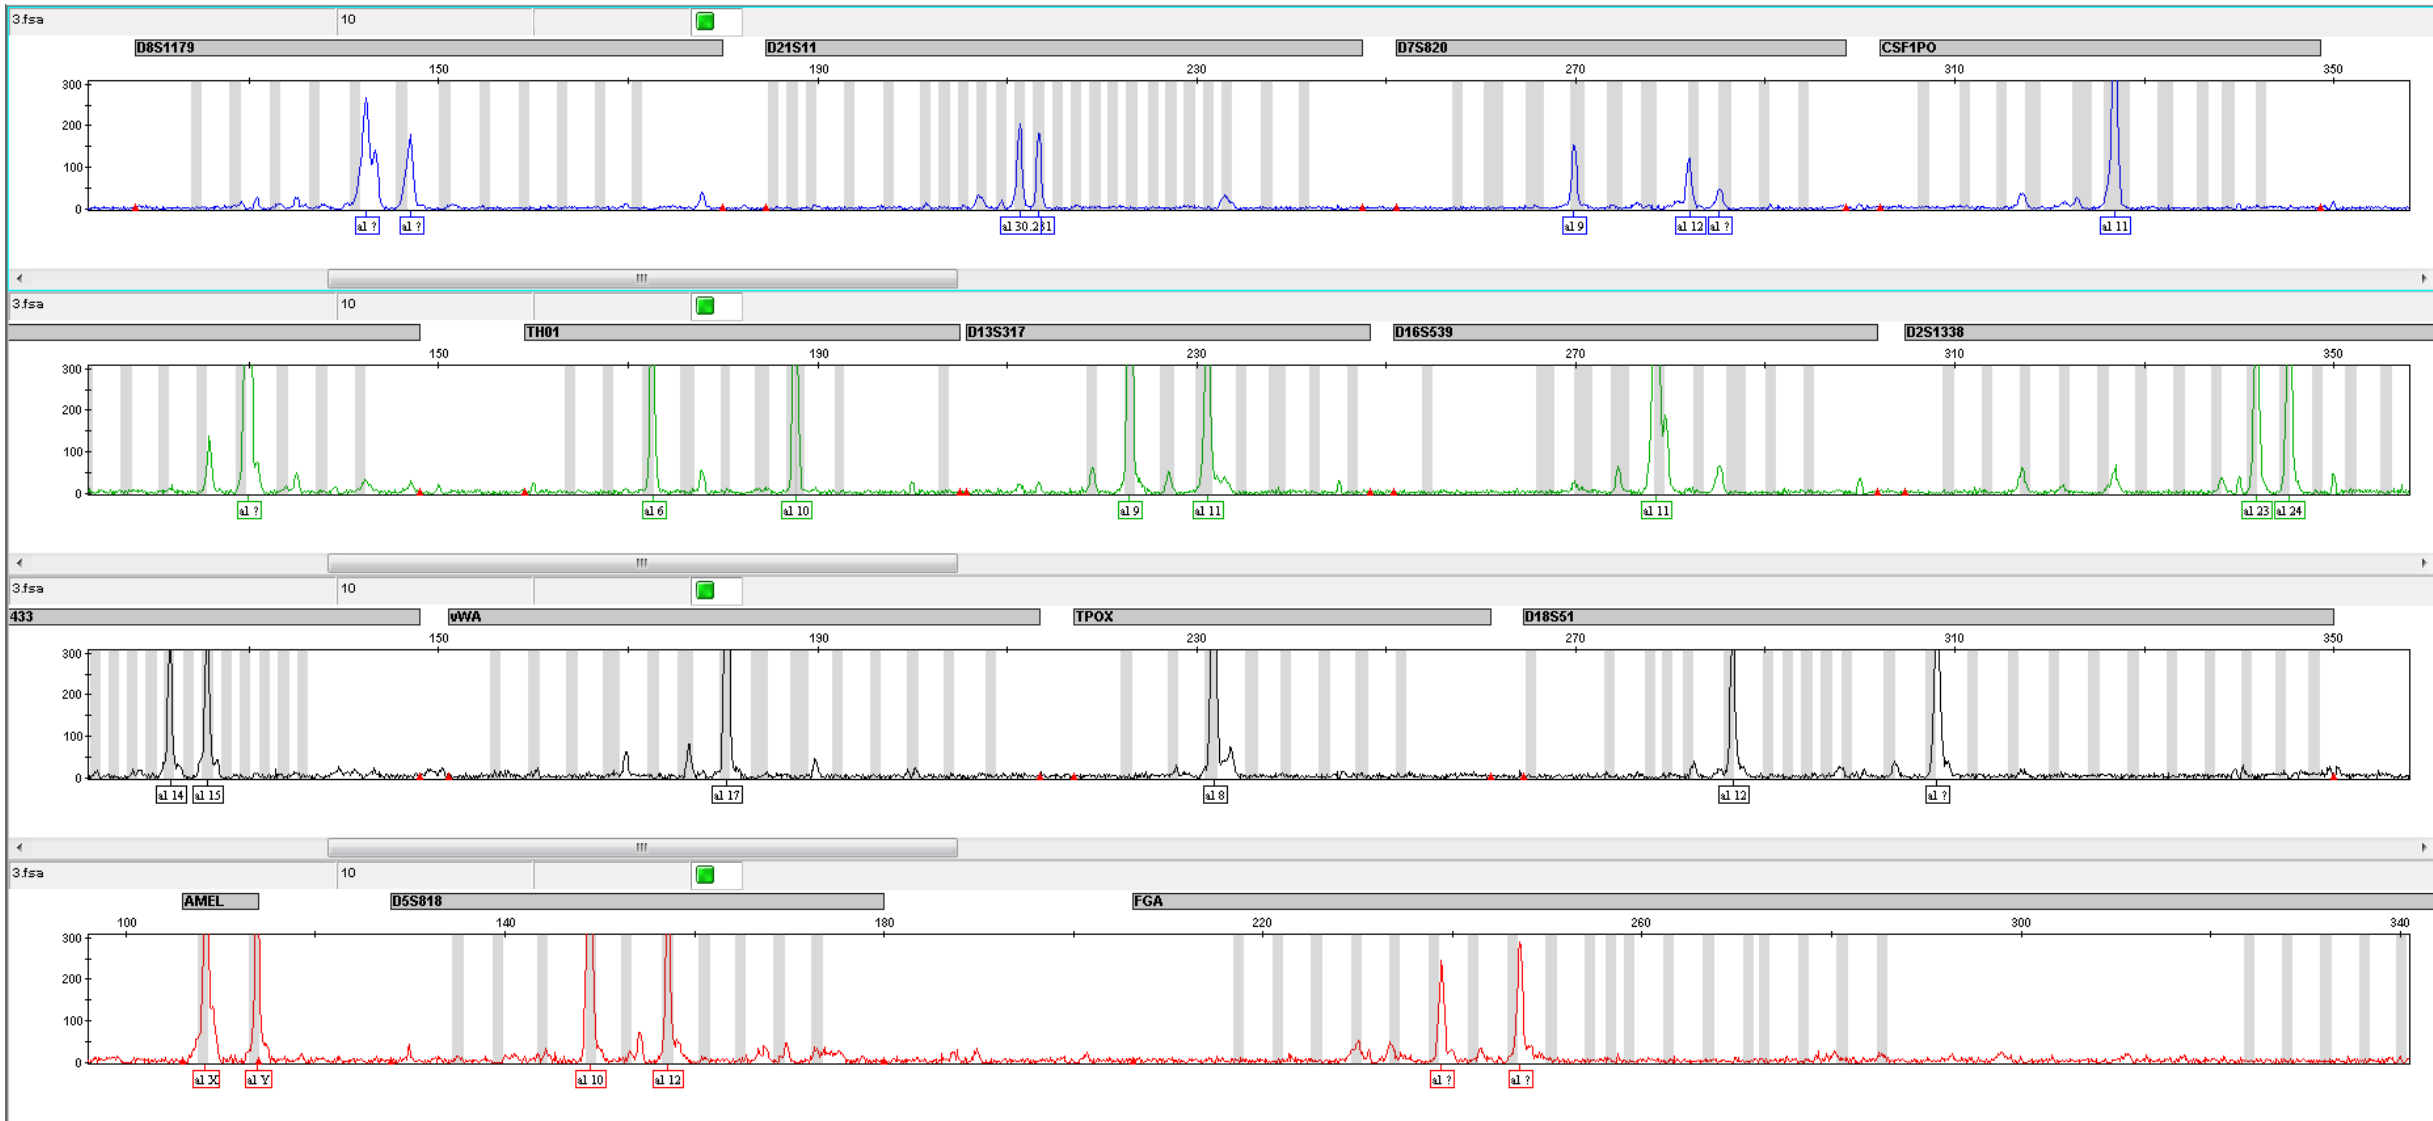

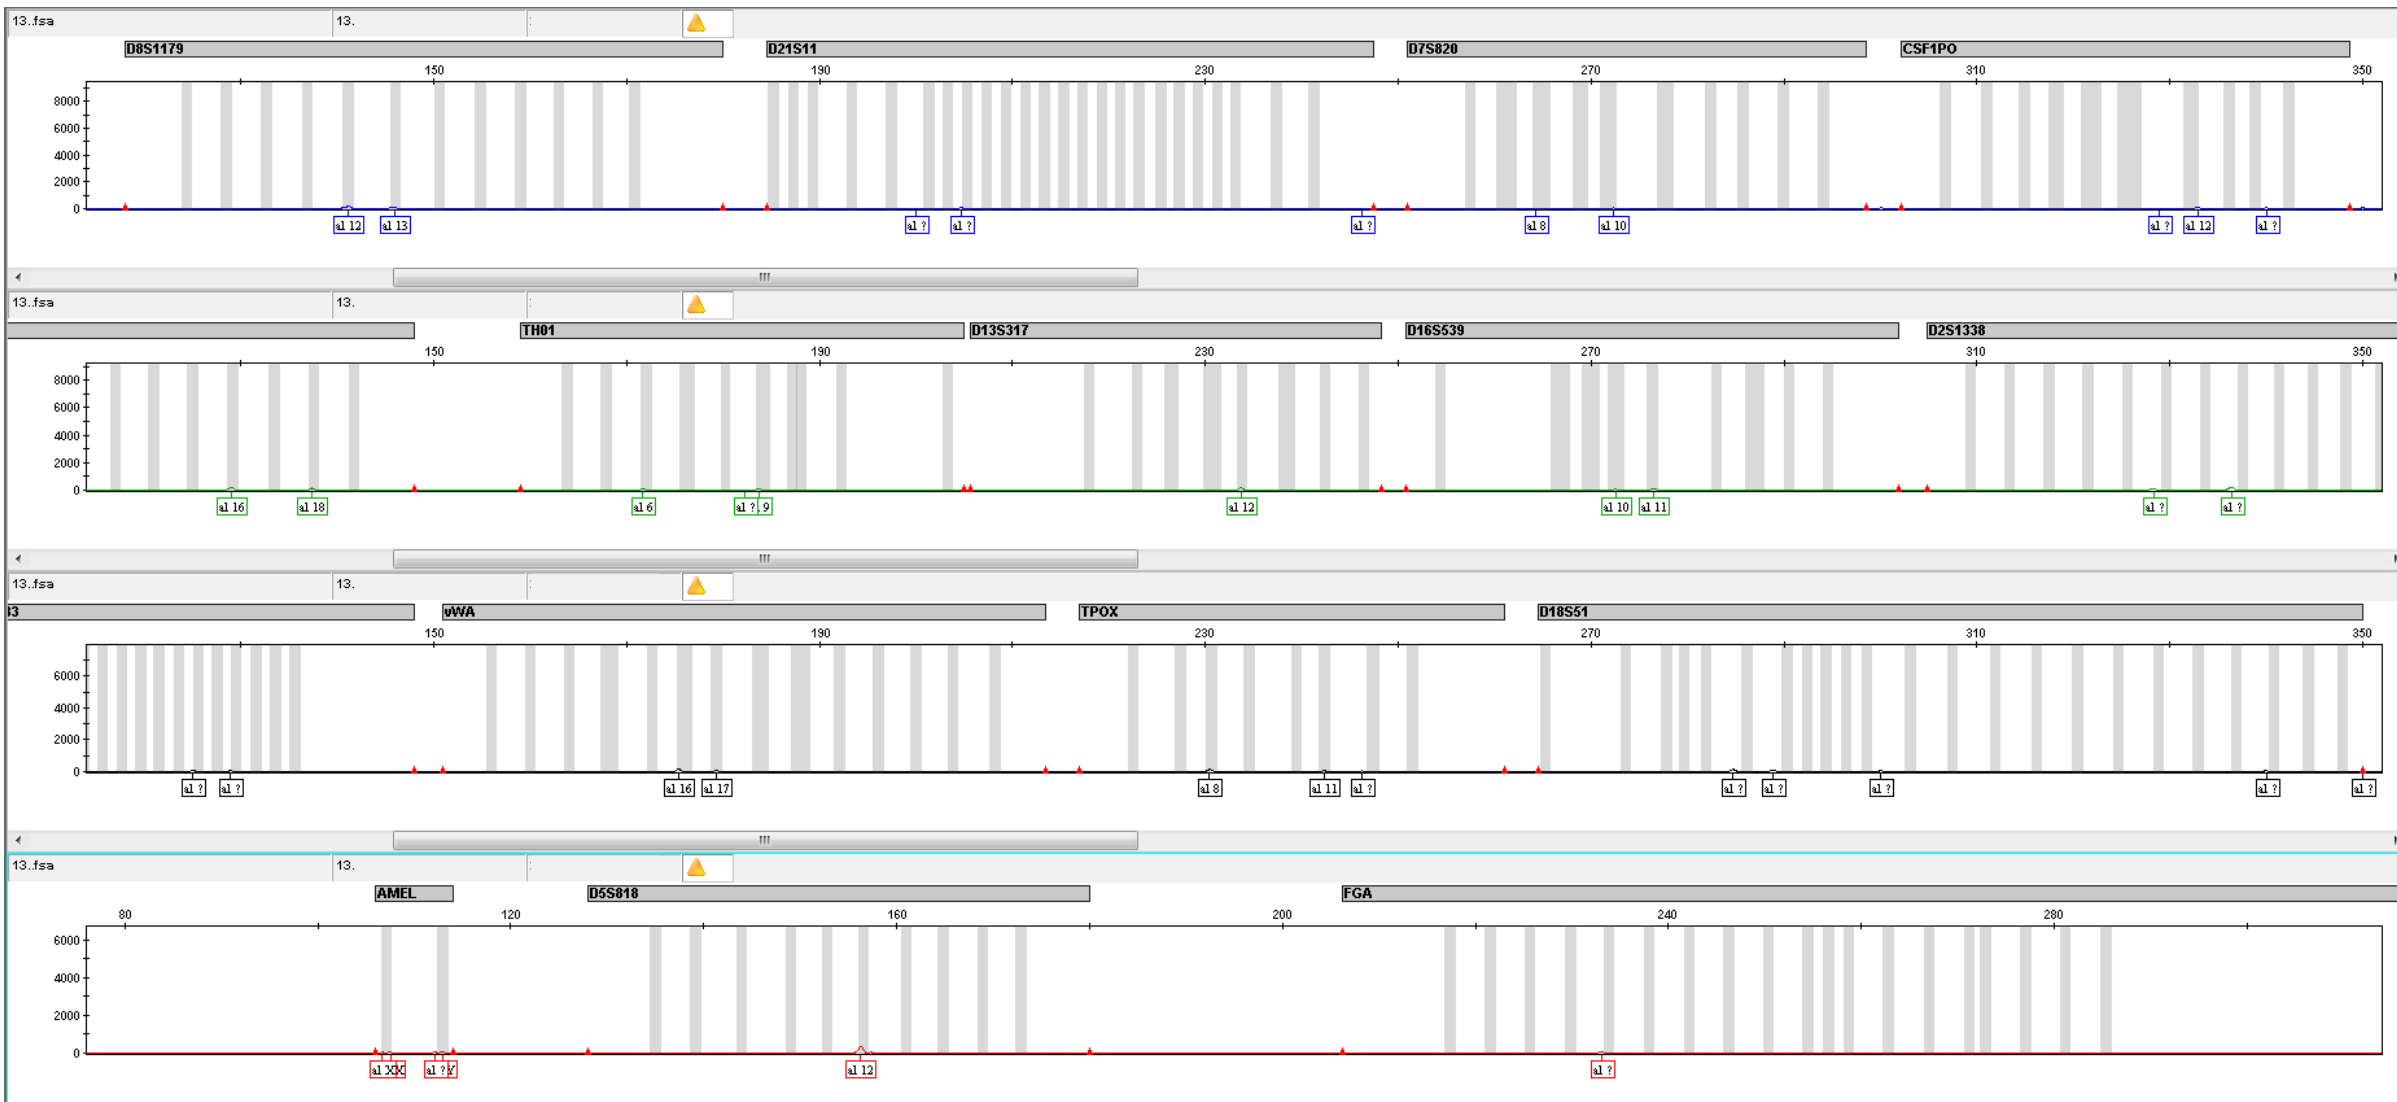

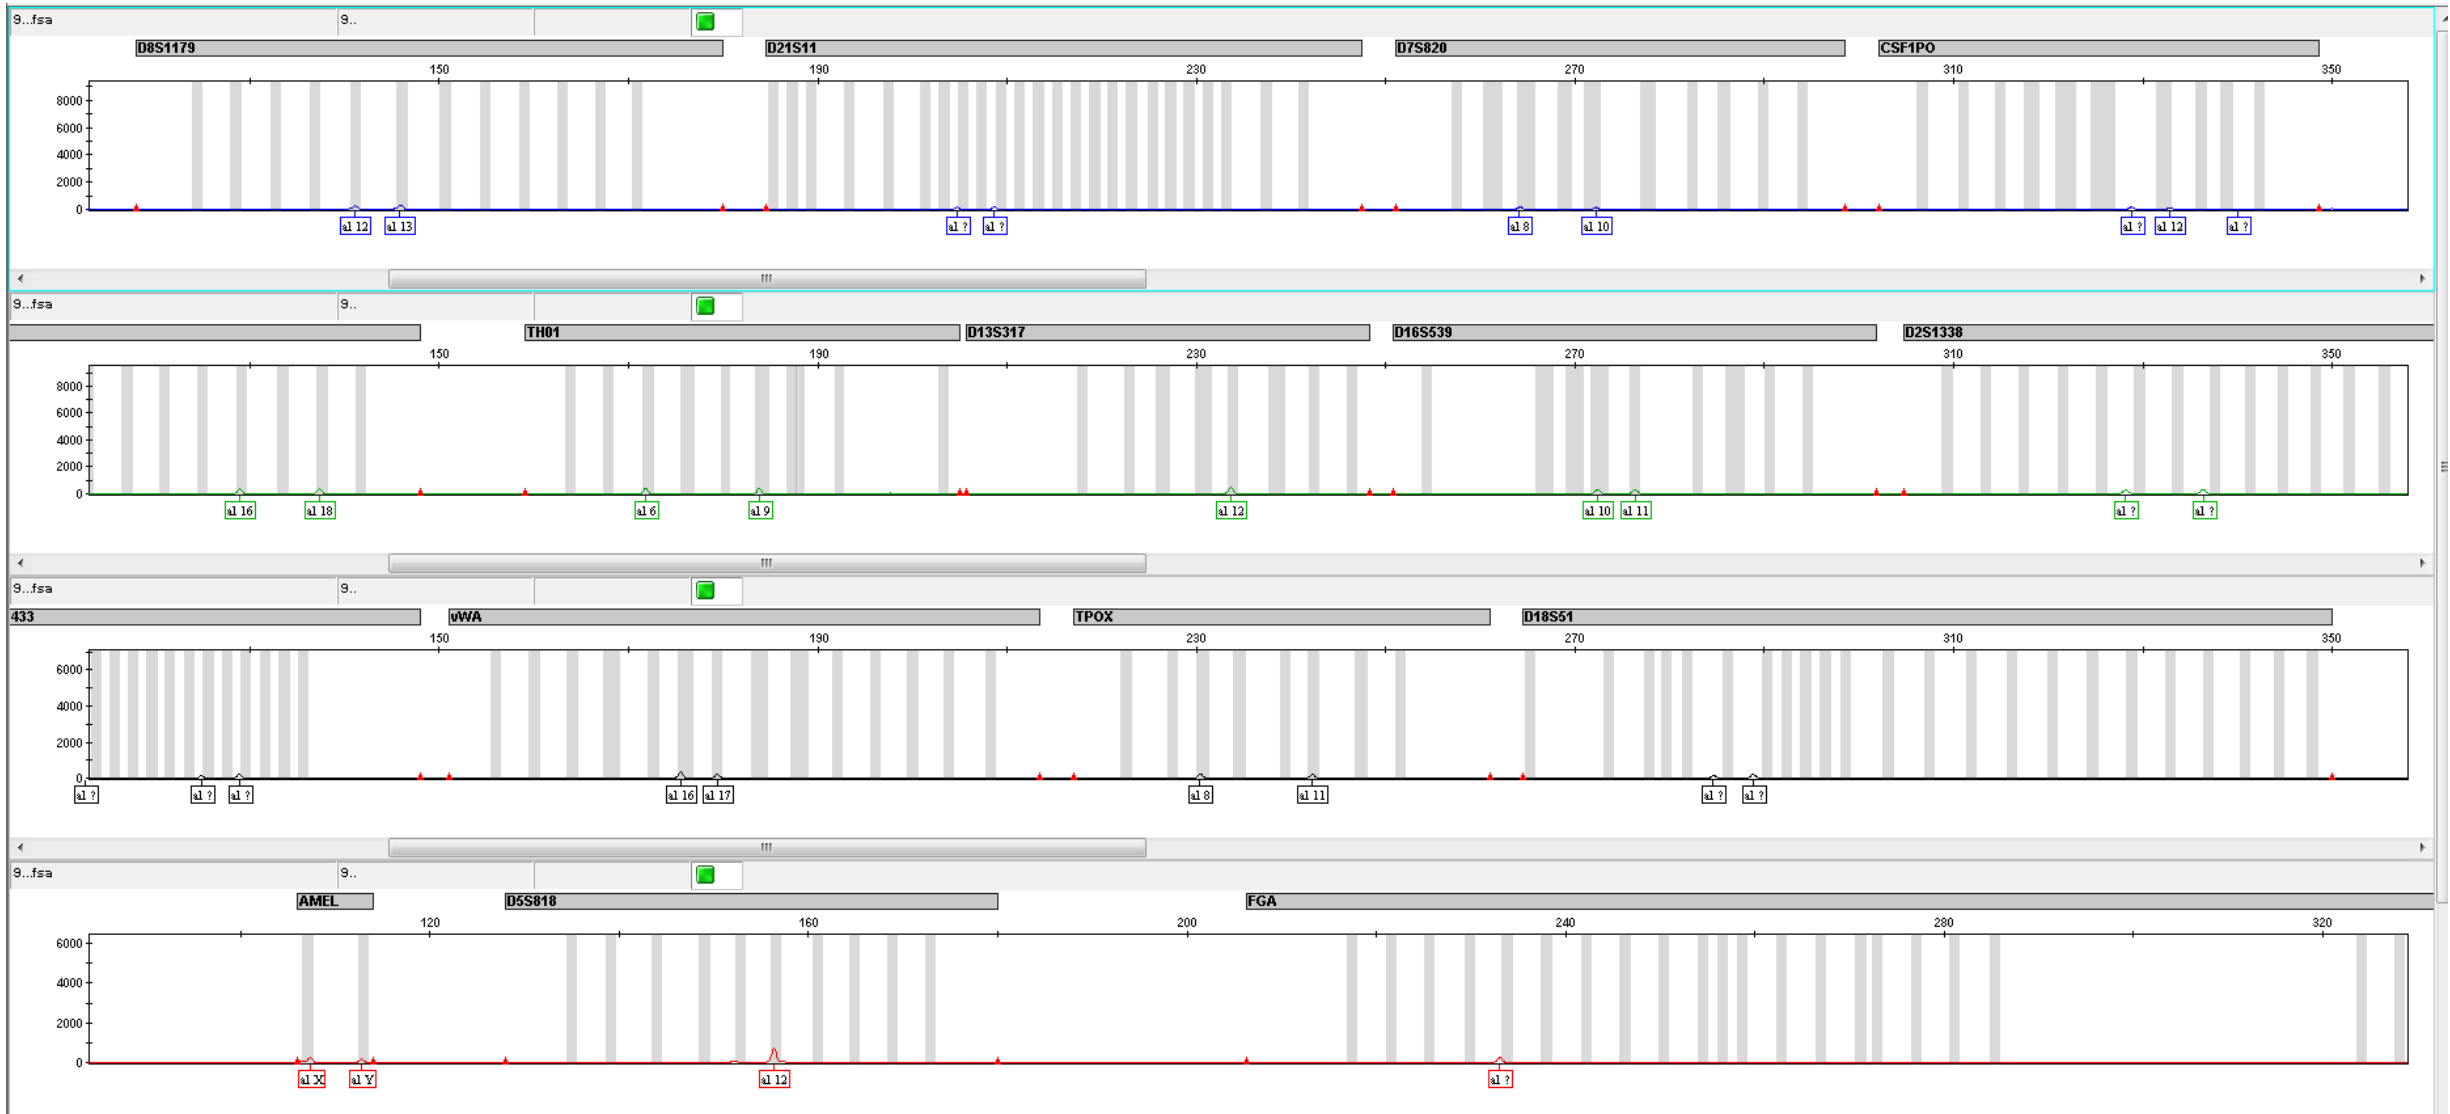

SYN01

TUMOR

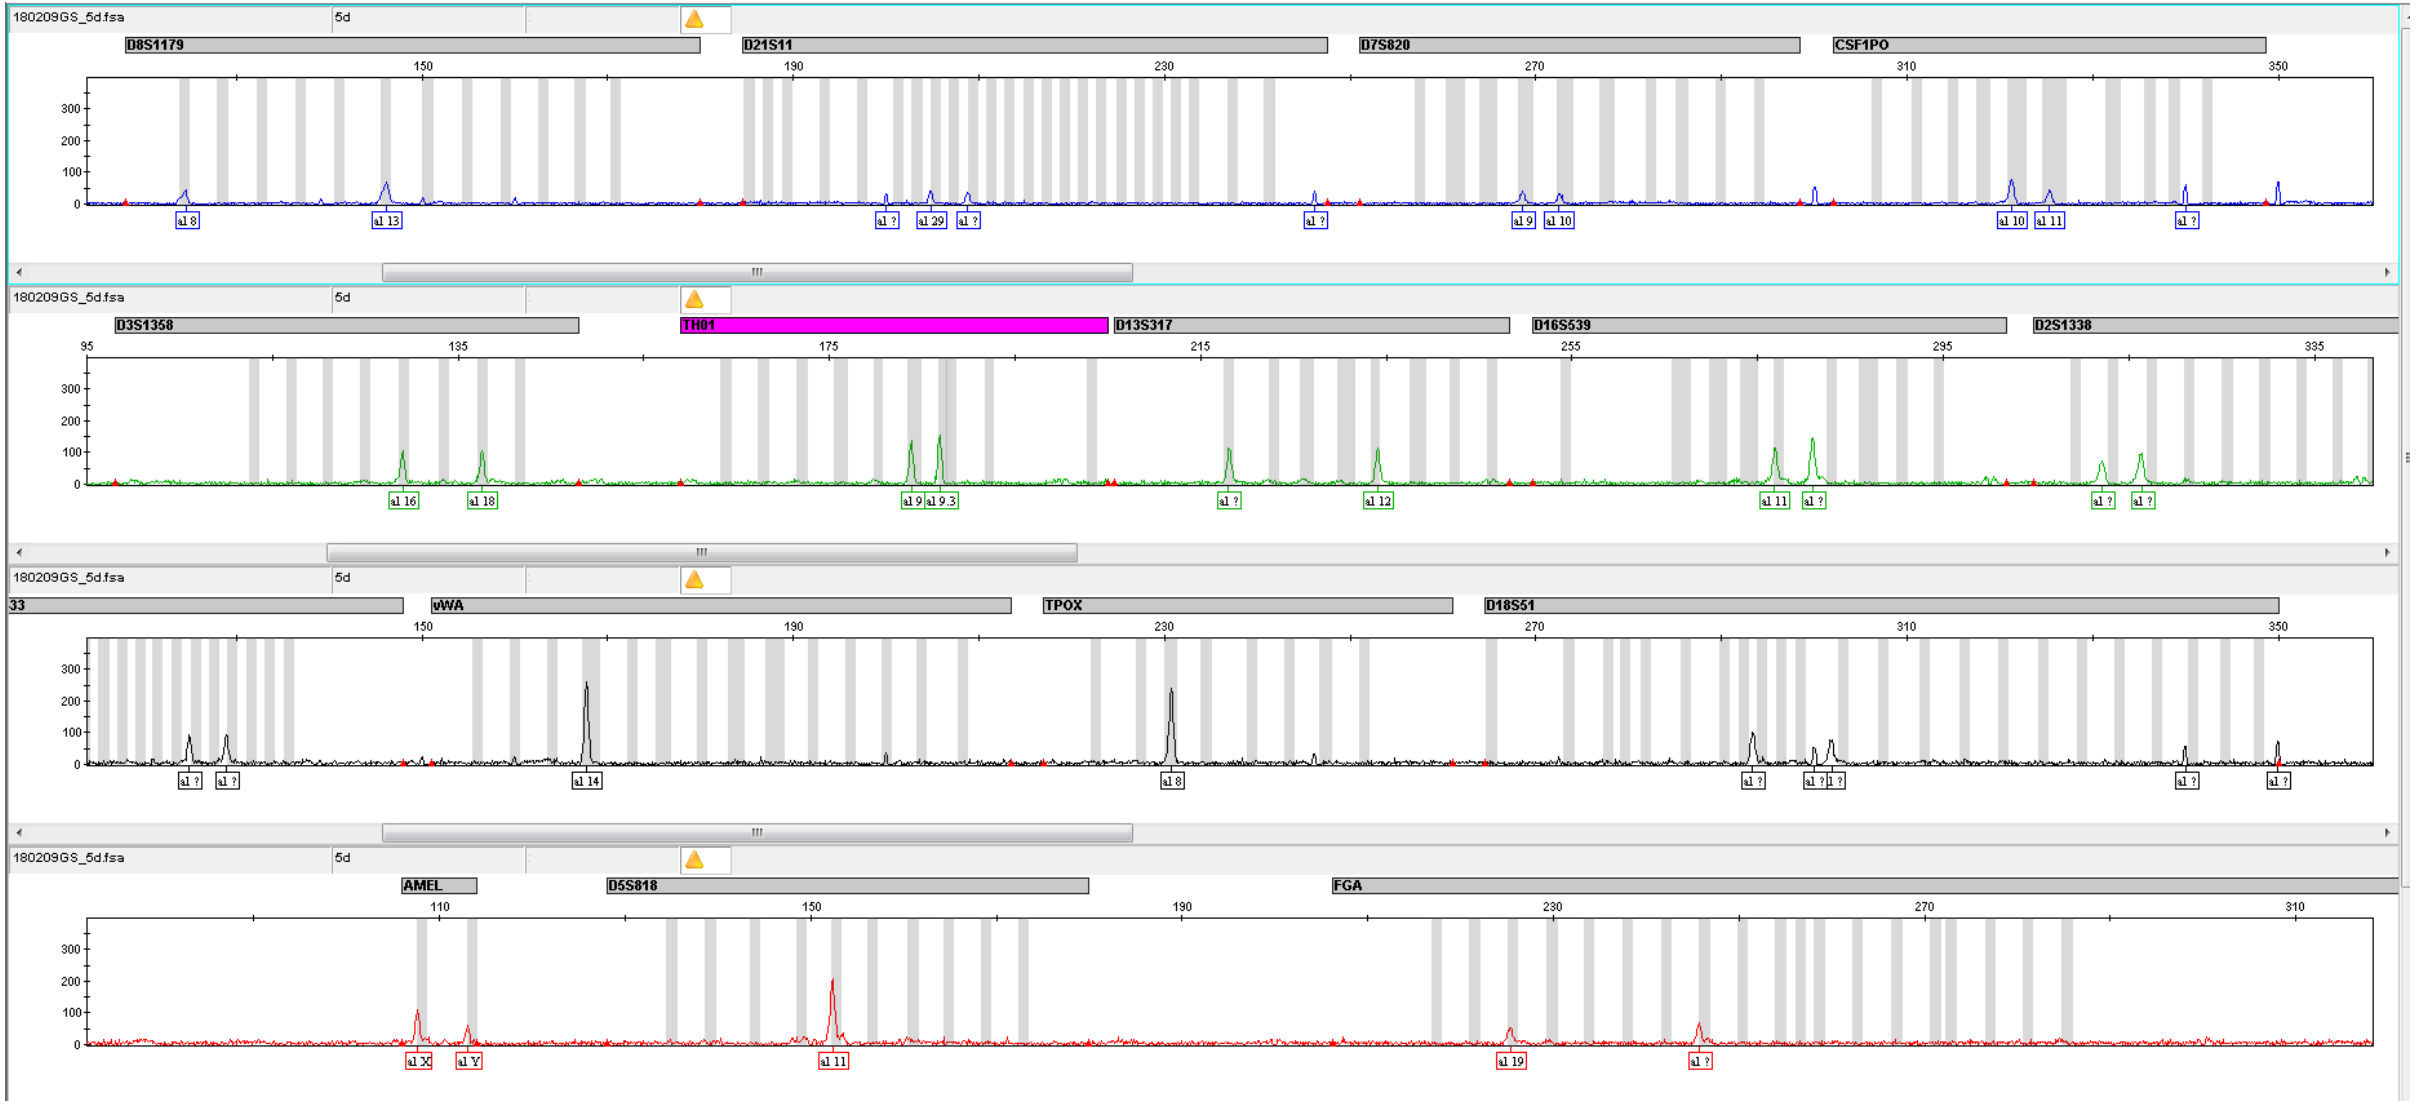

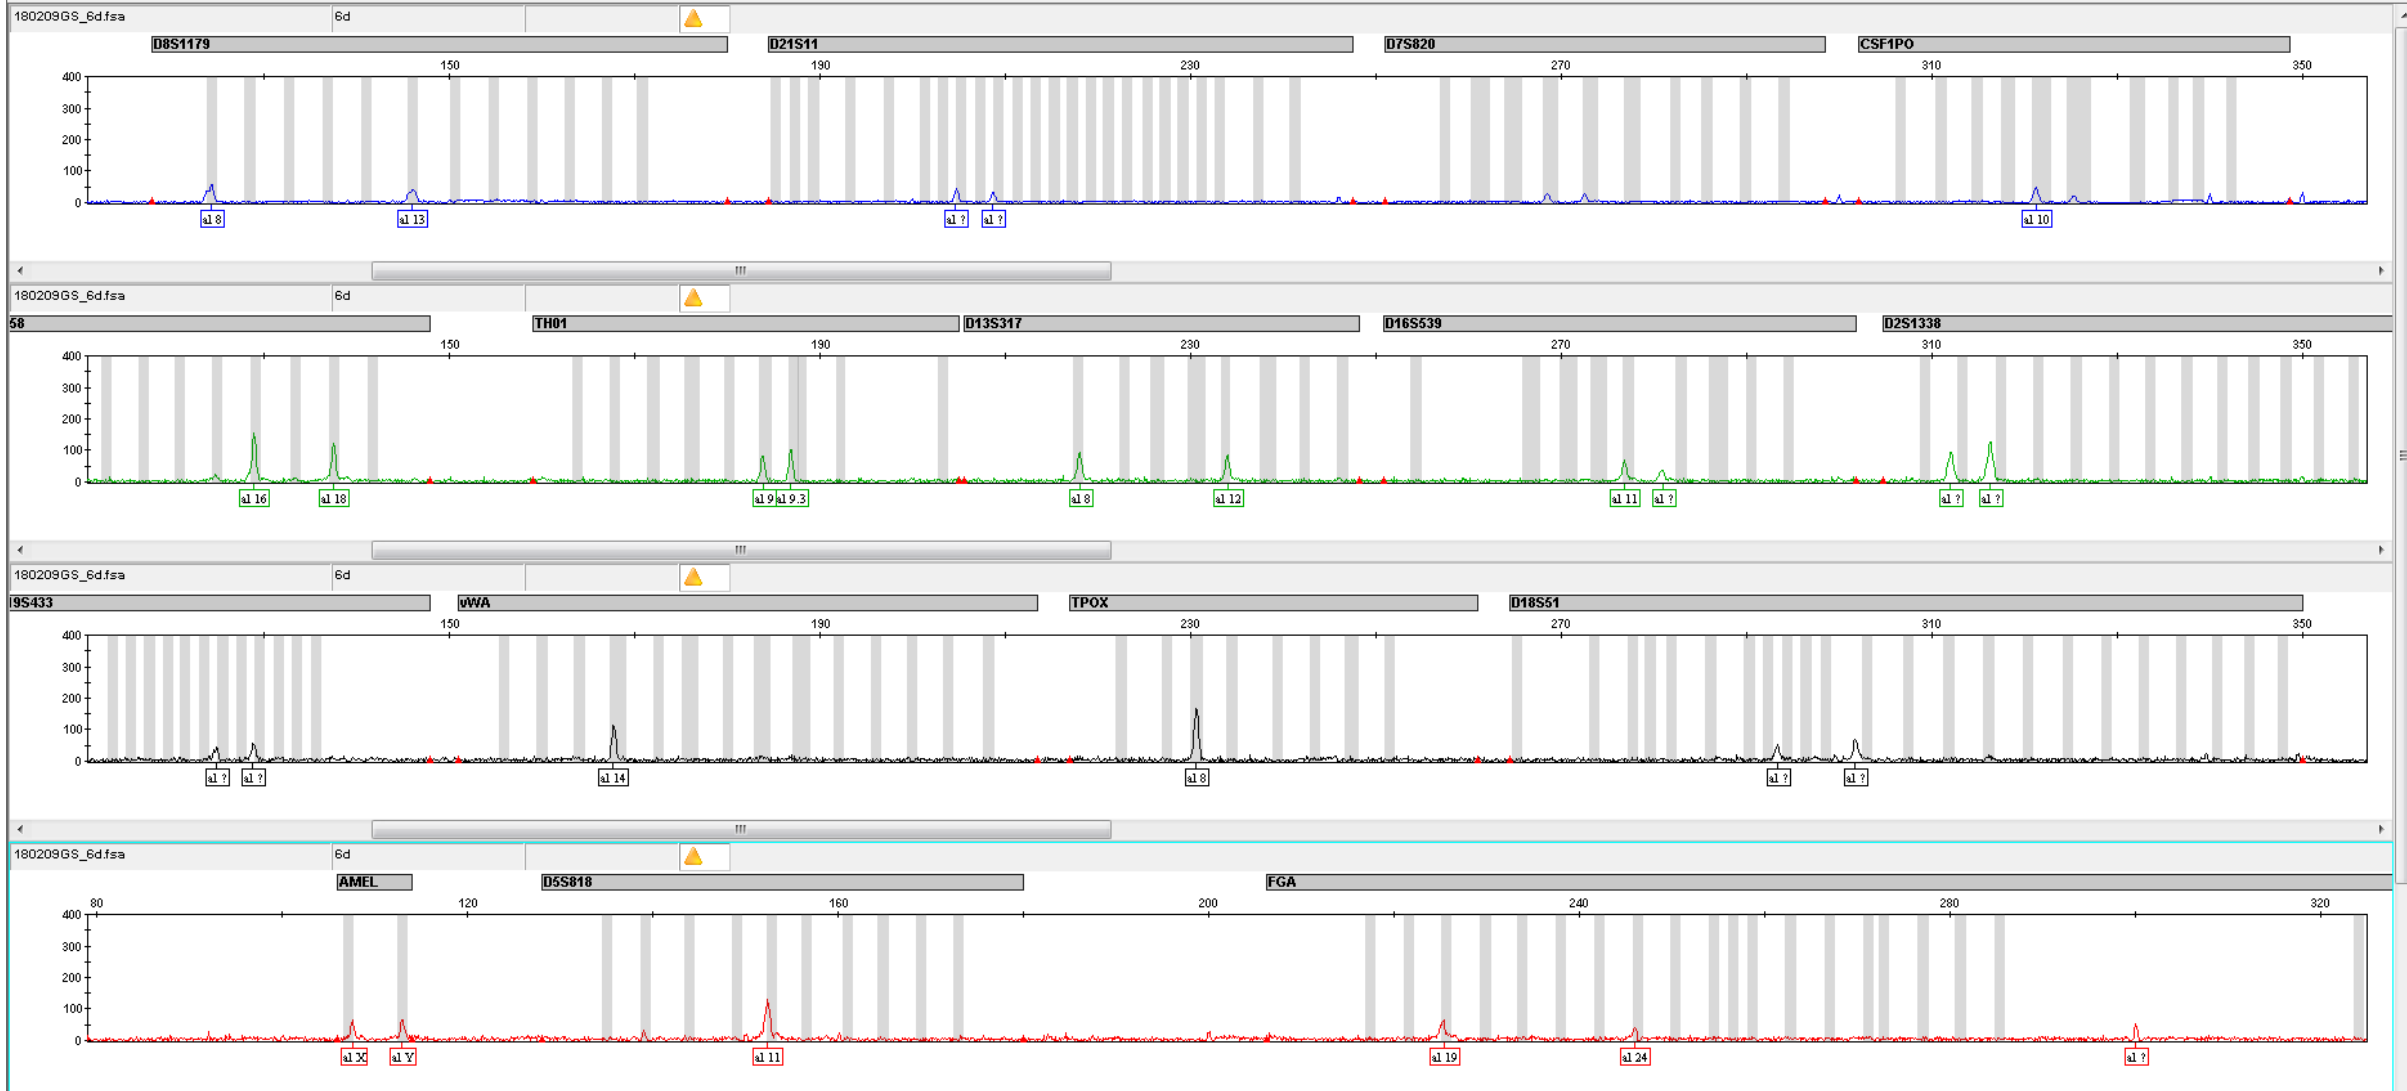



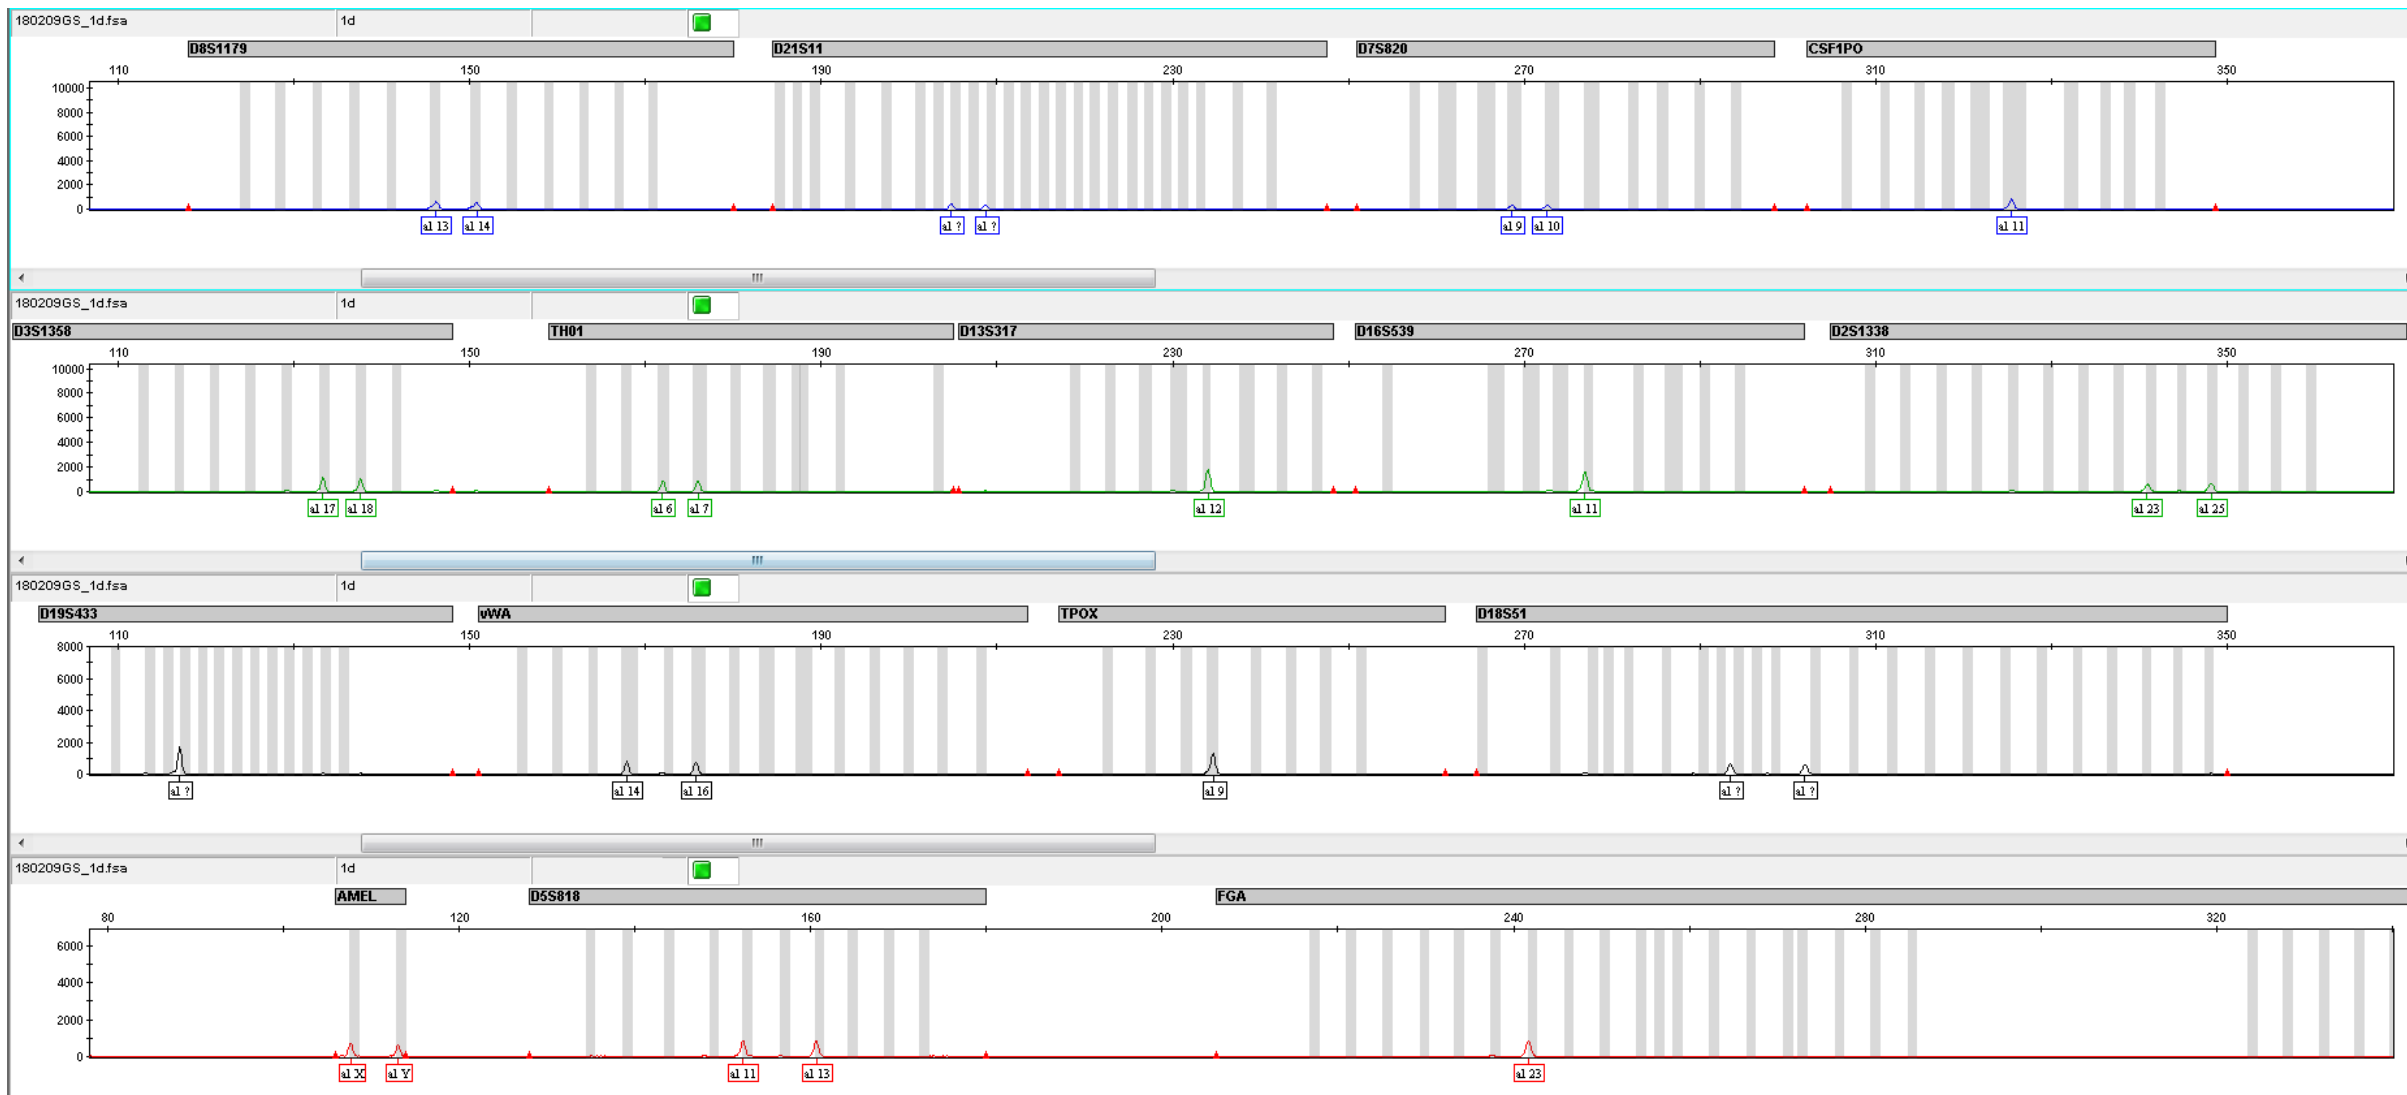

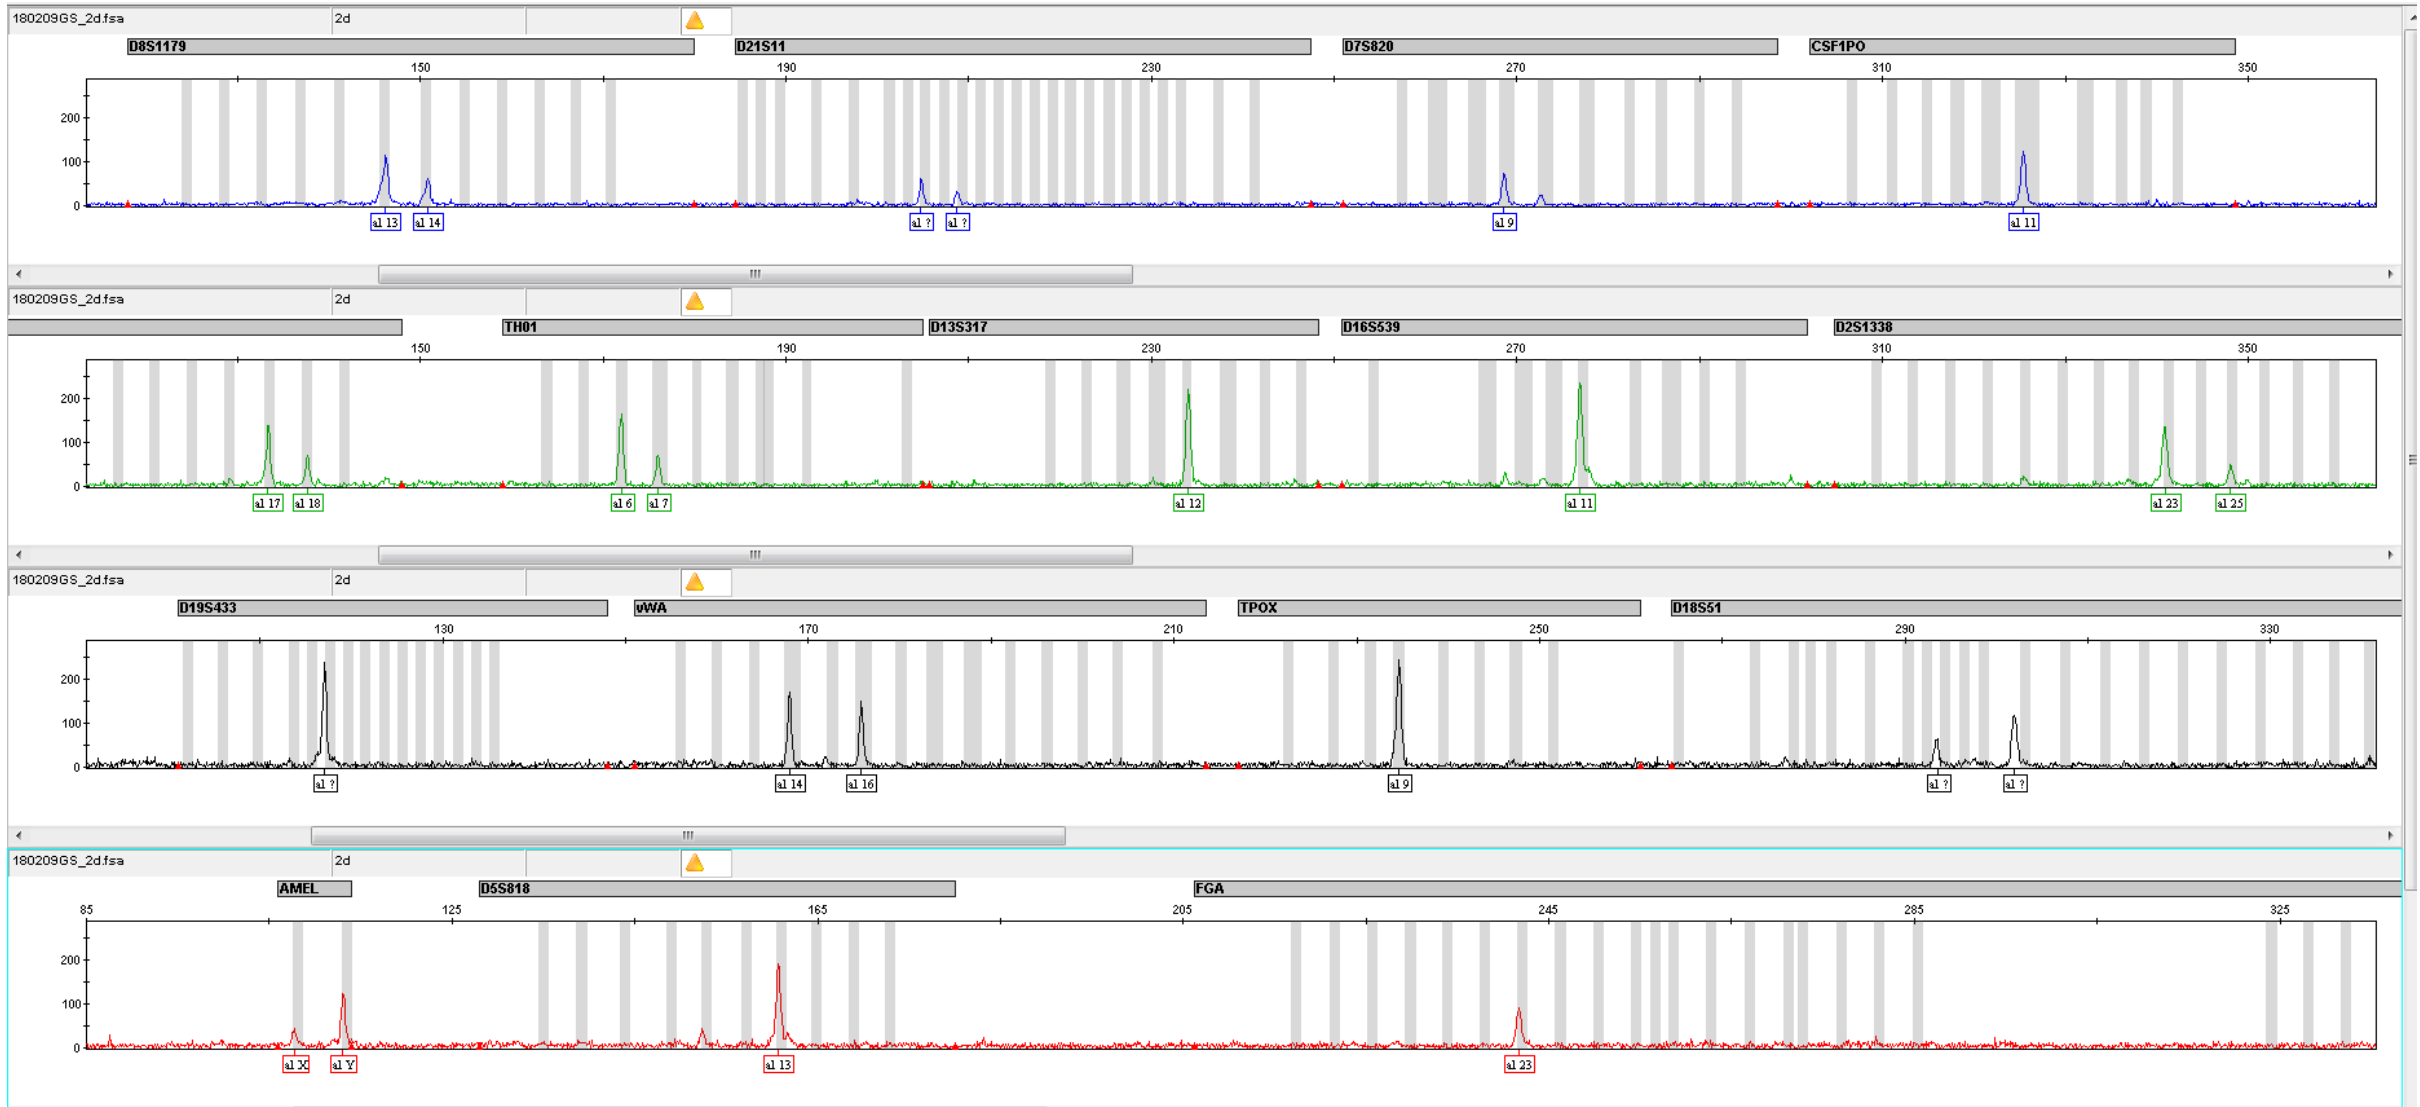

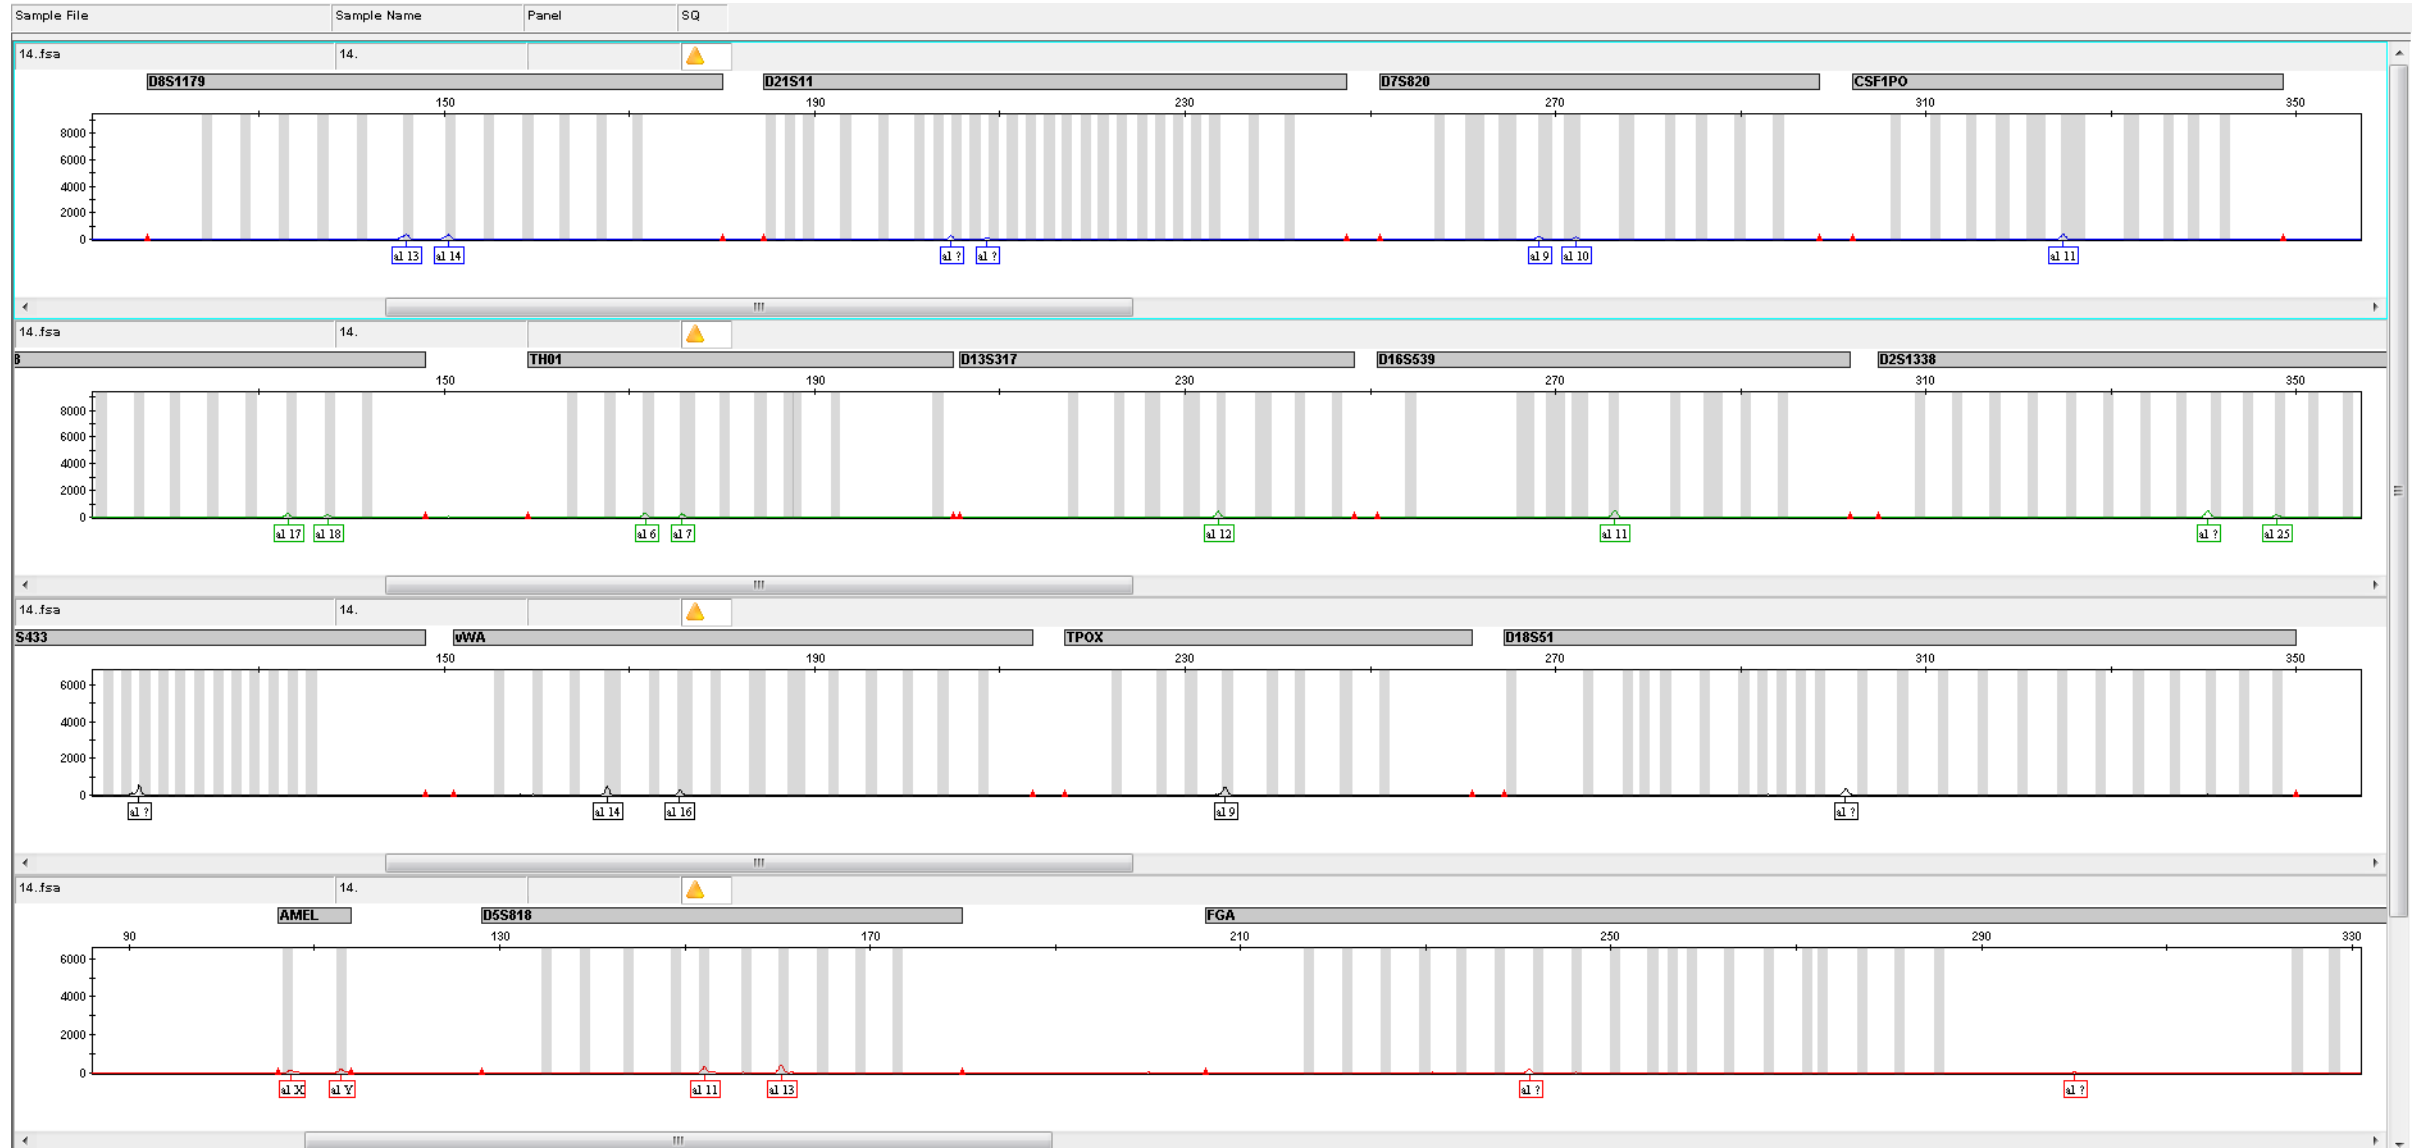

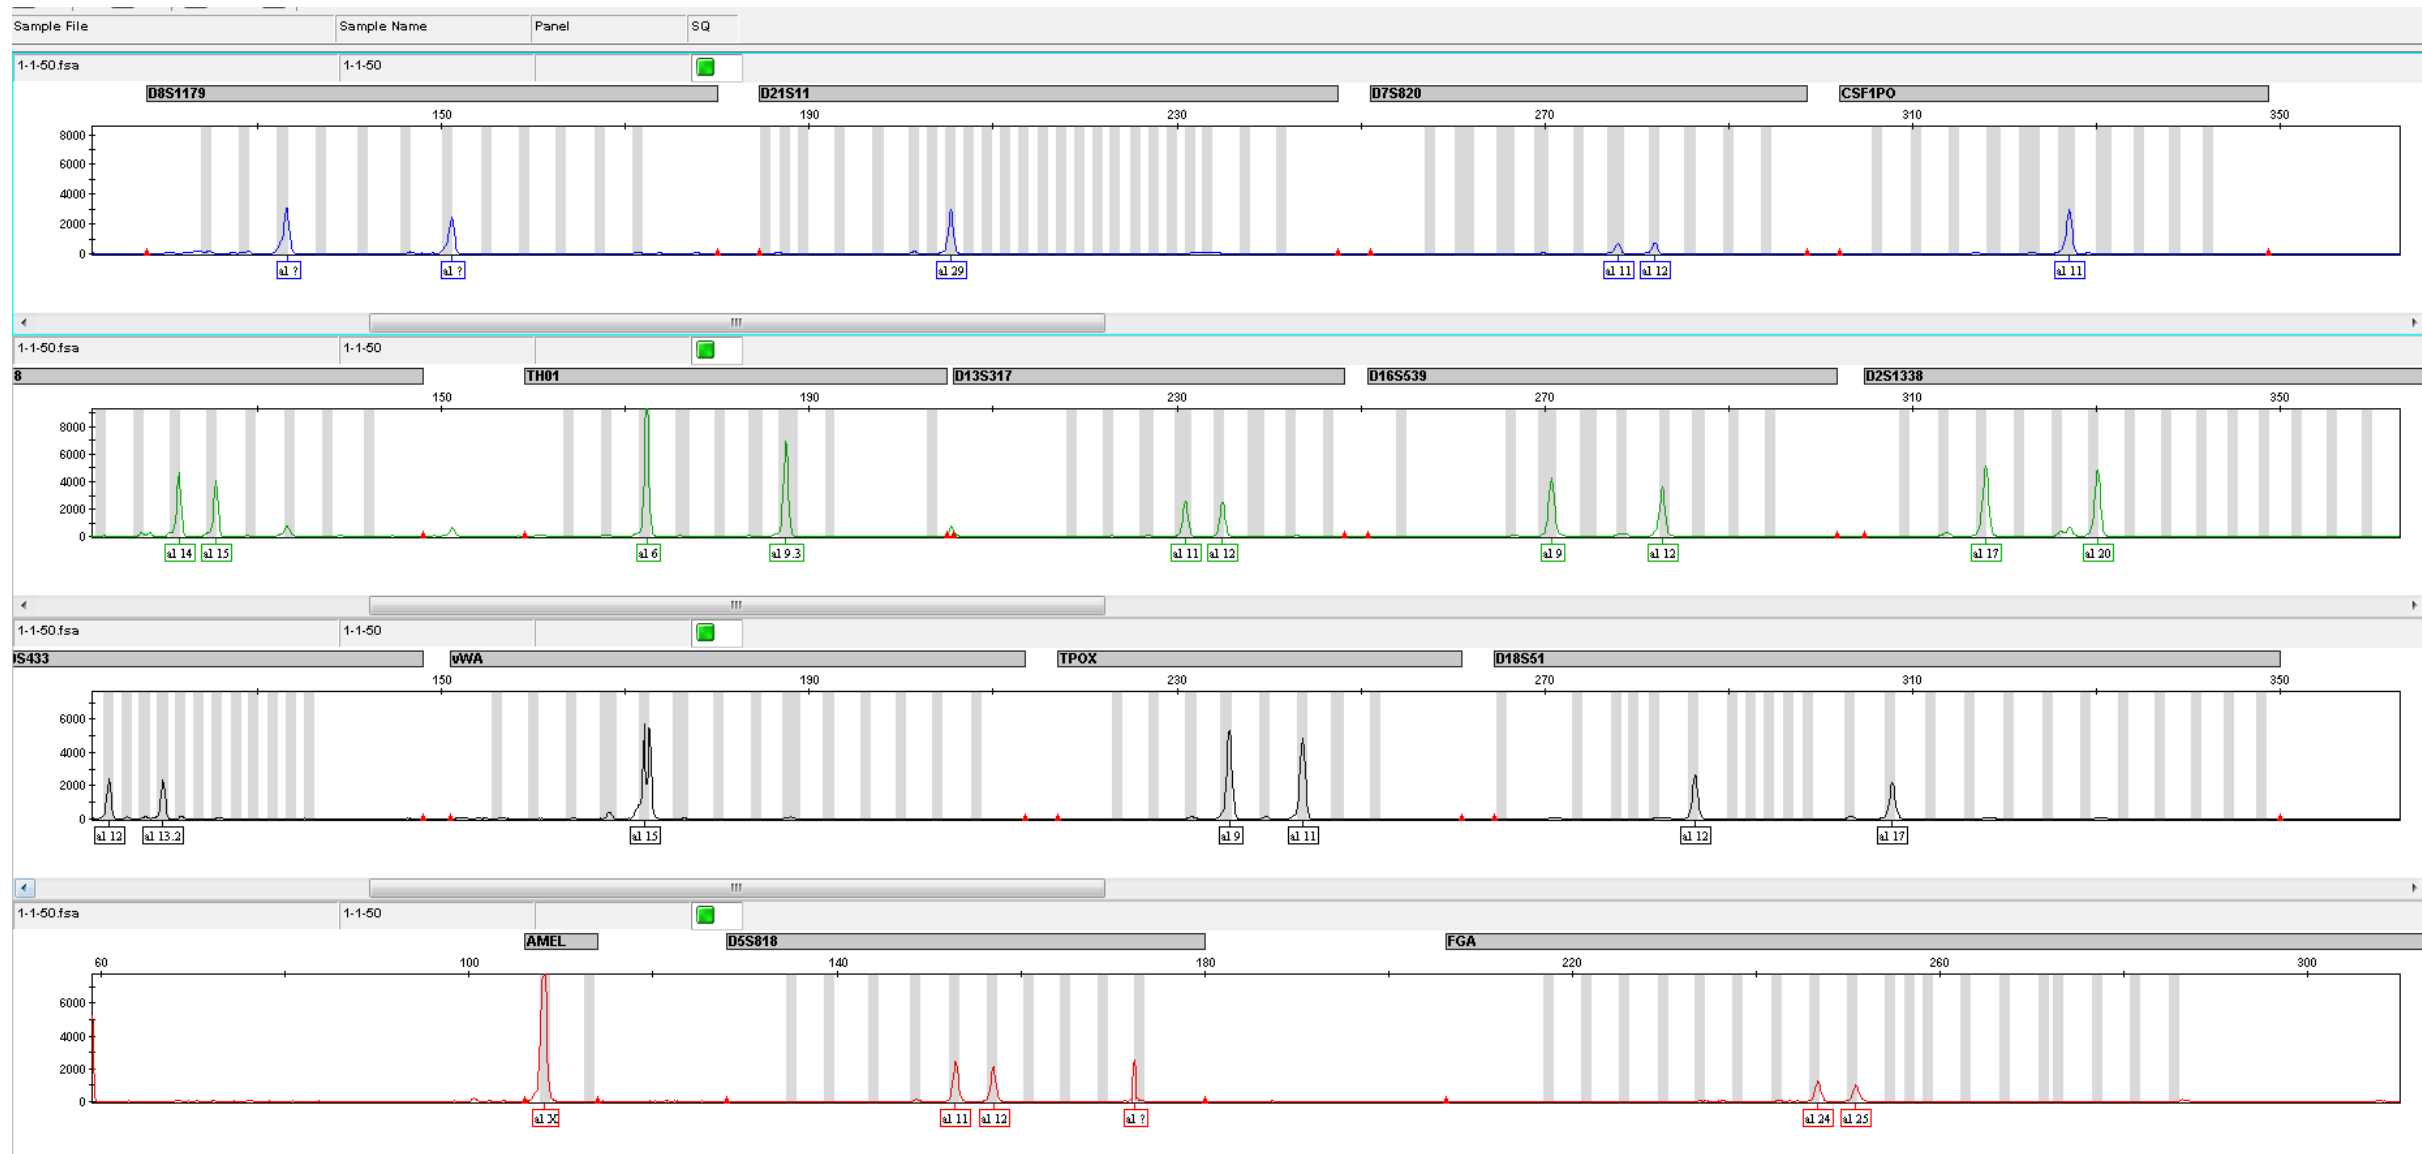

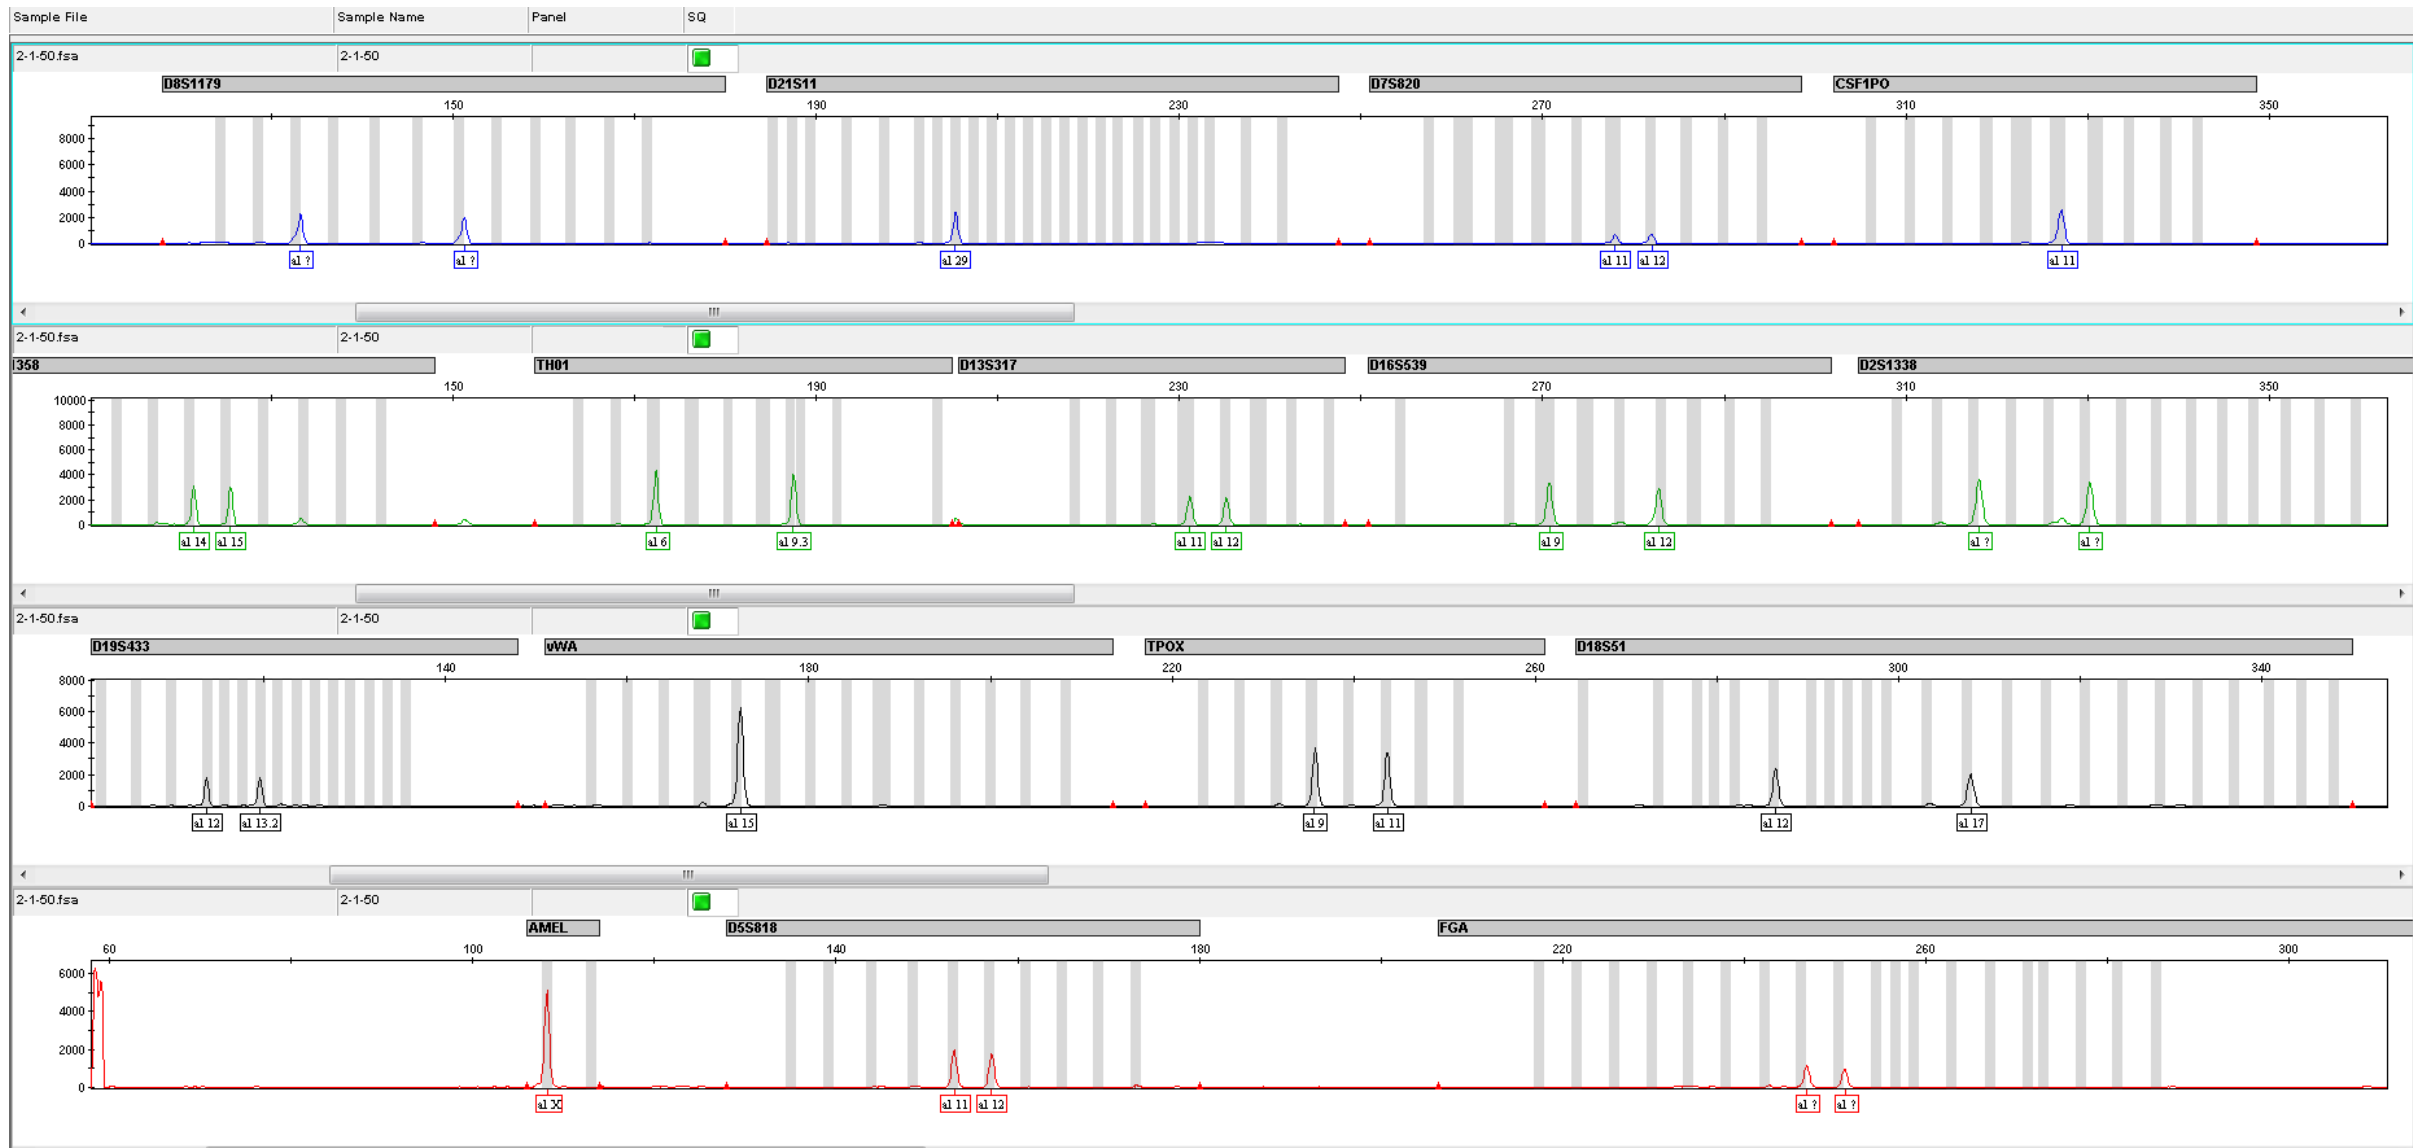

CDS23

TUMOR

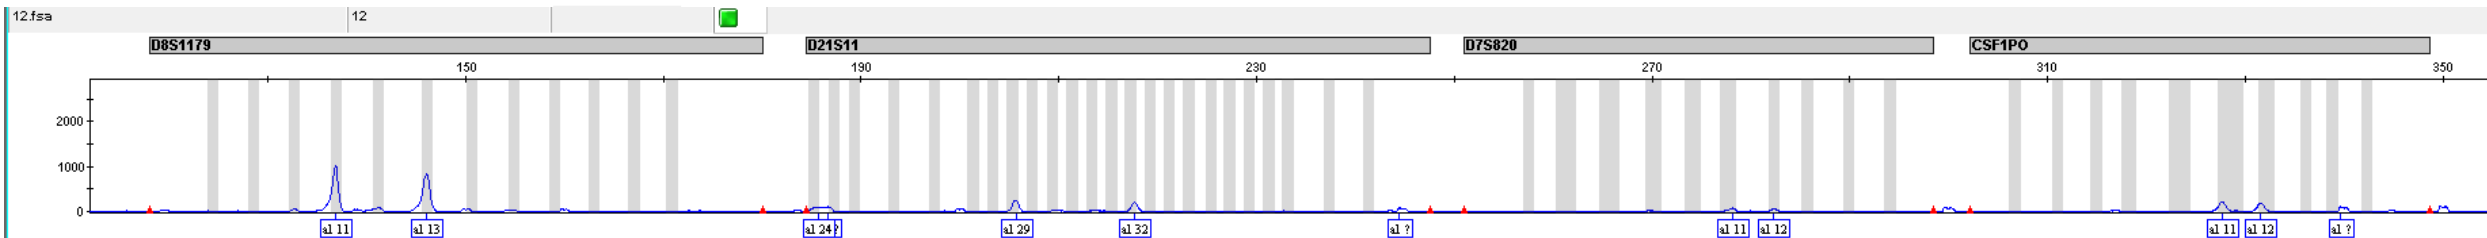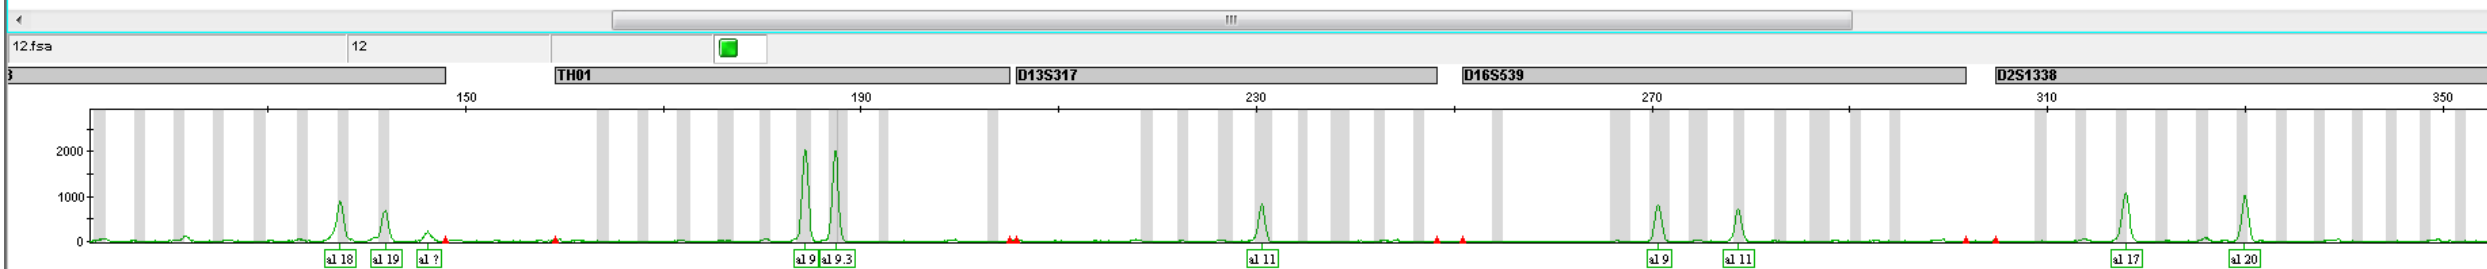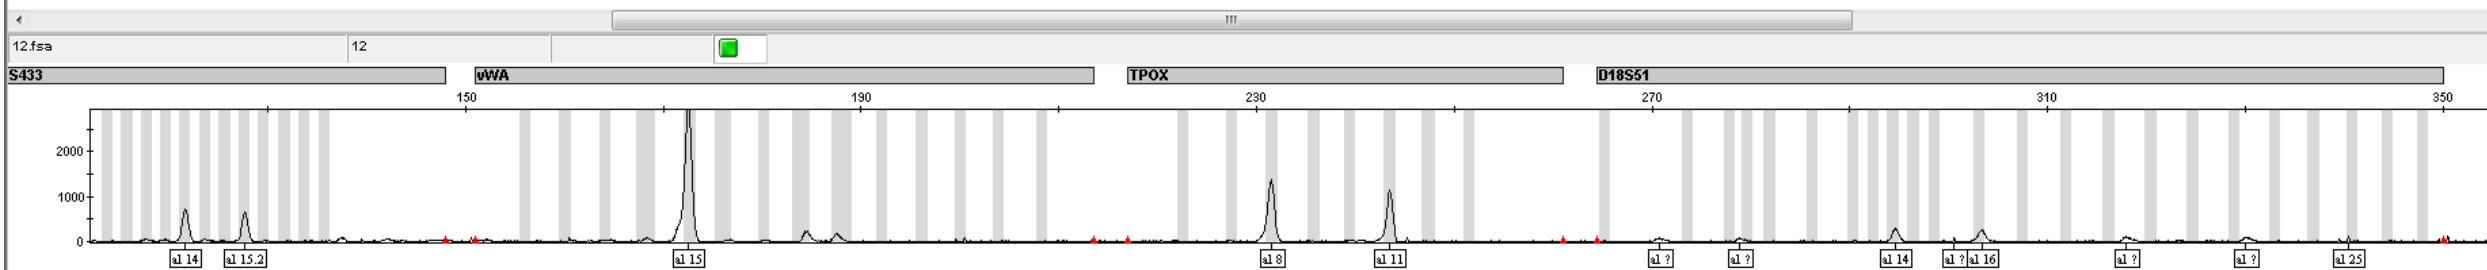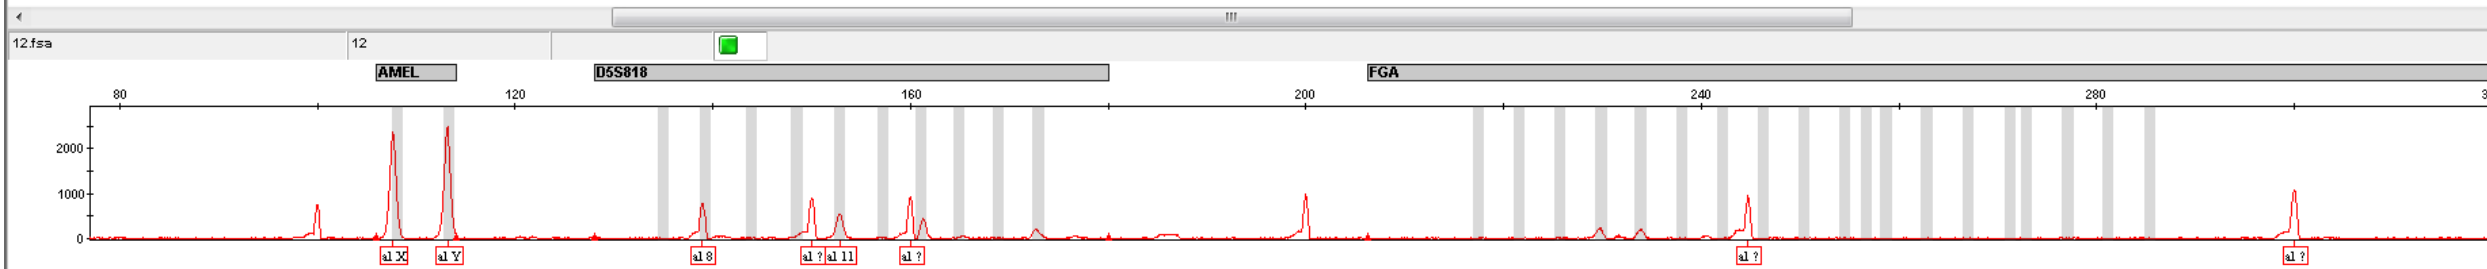

CDS23

CELL LINE

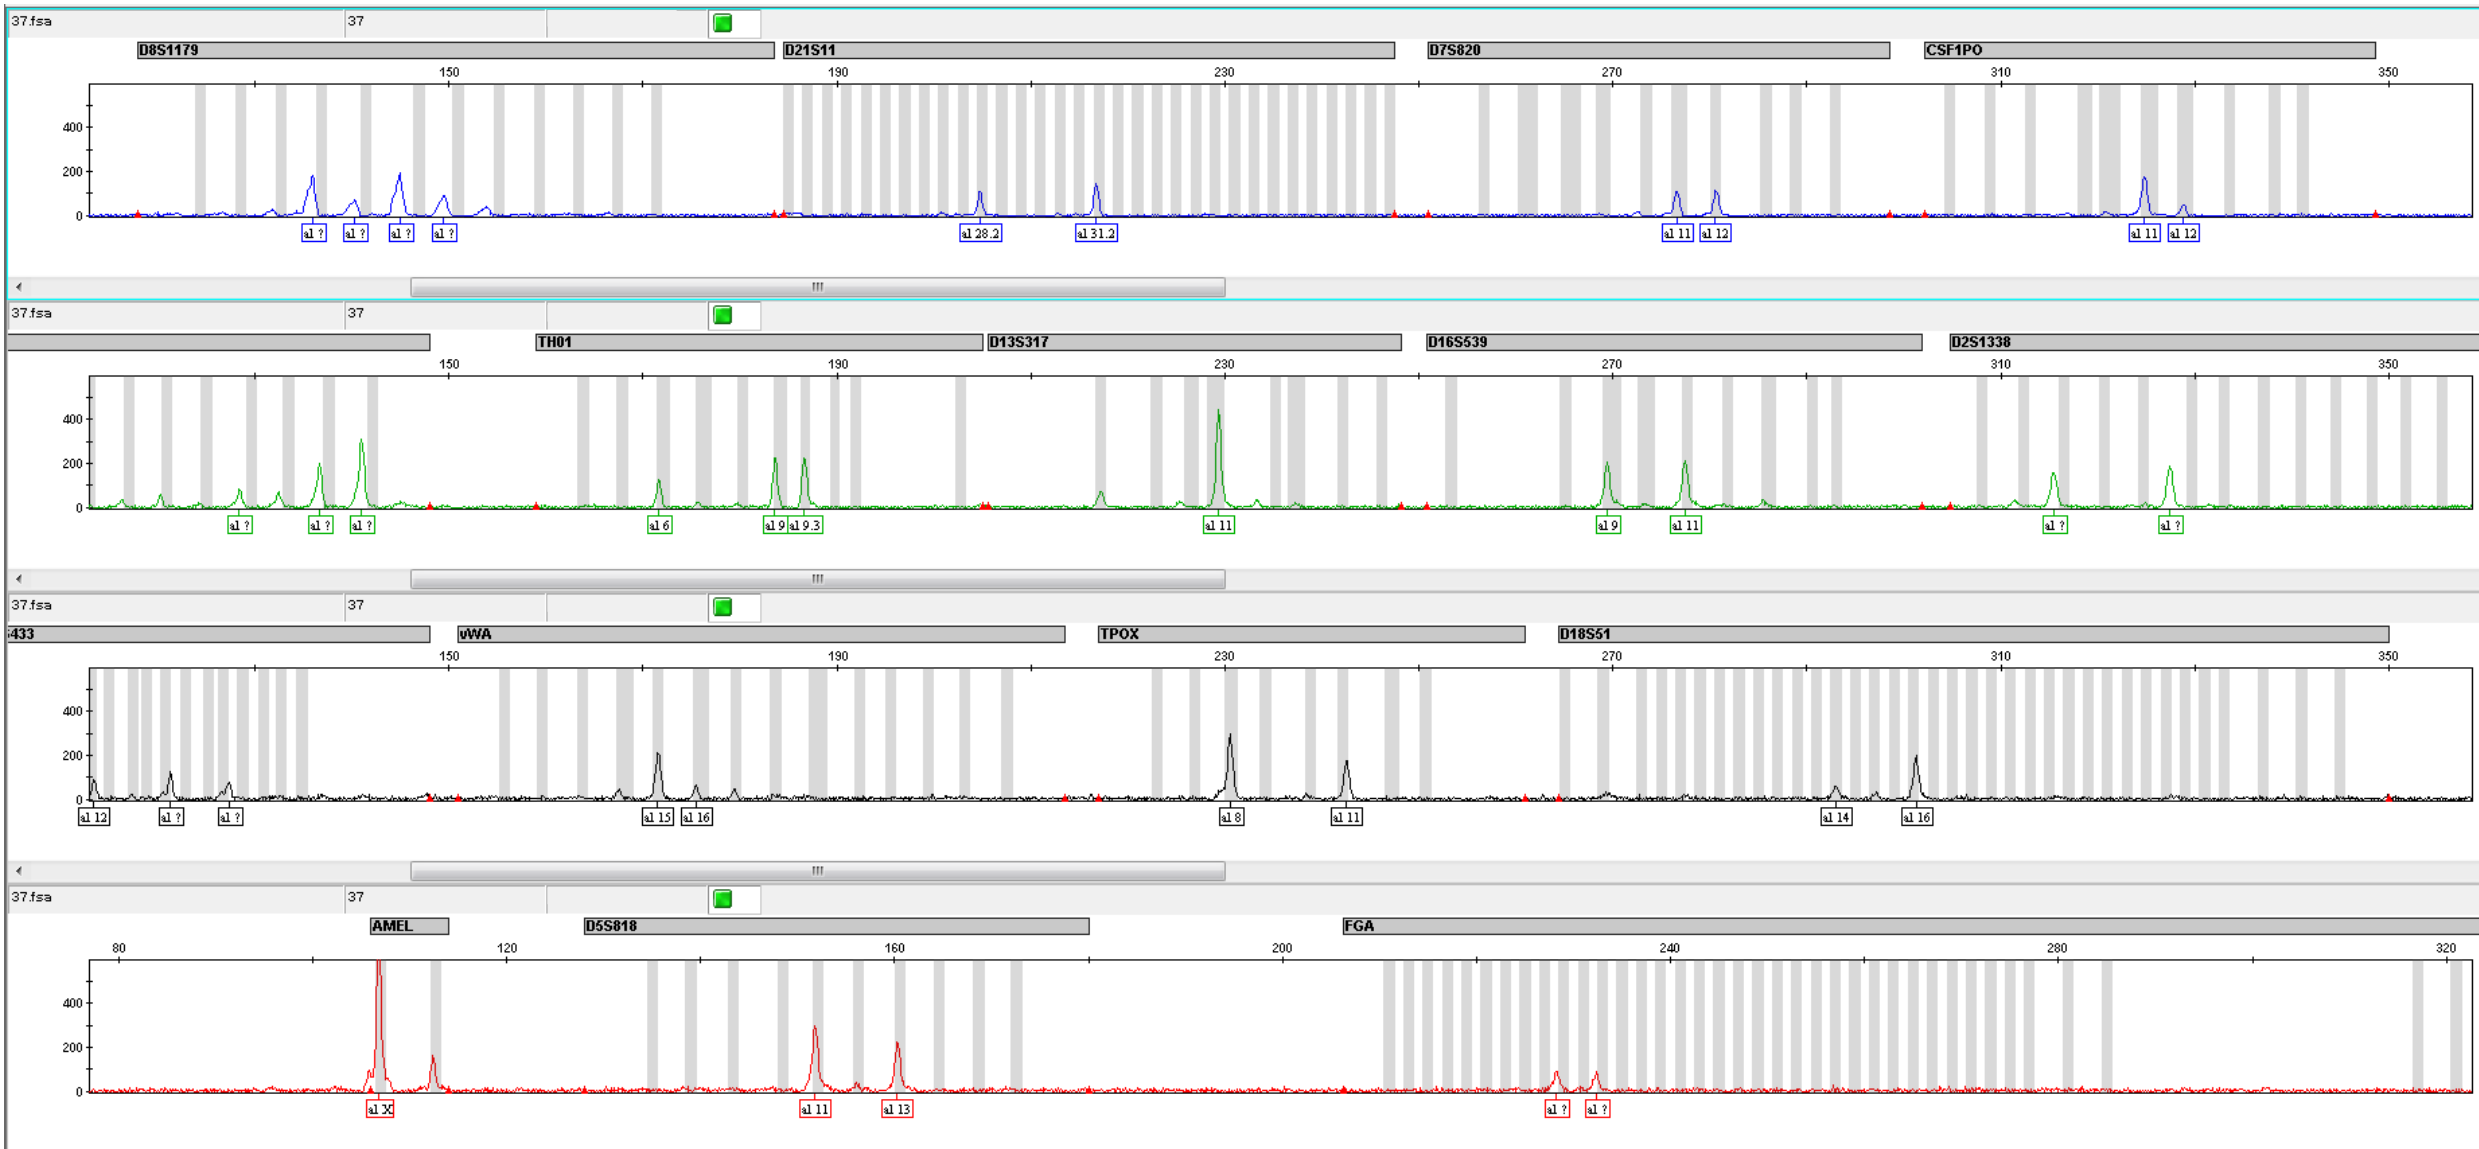

SW1353

CELL LINE

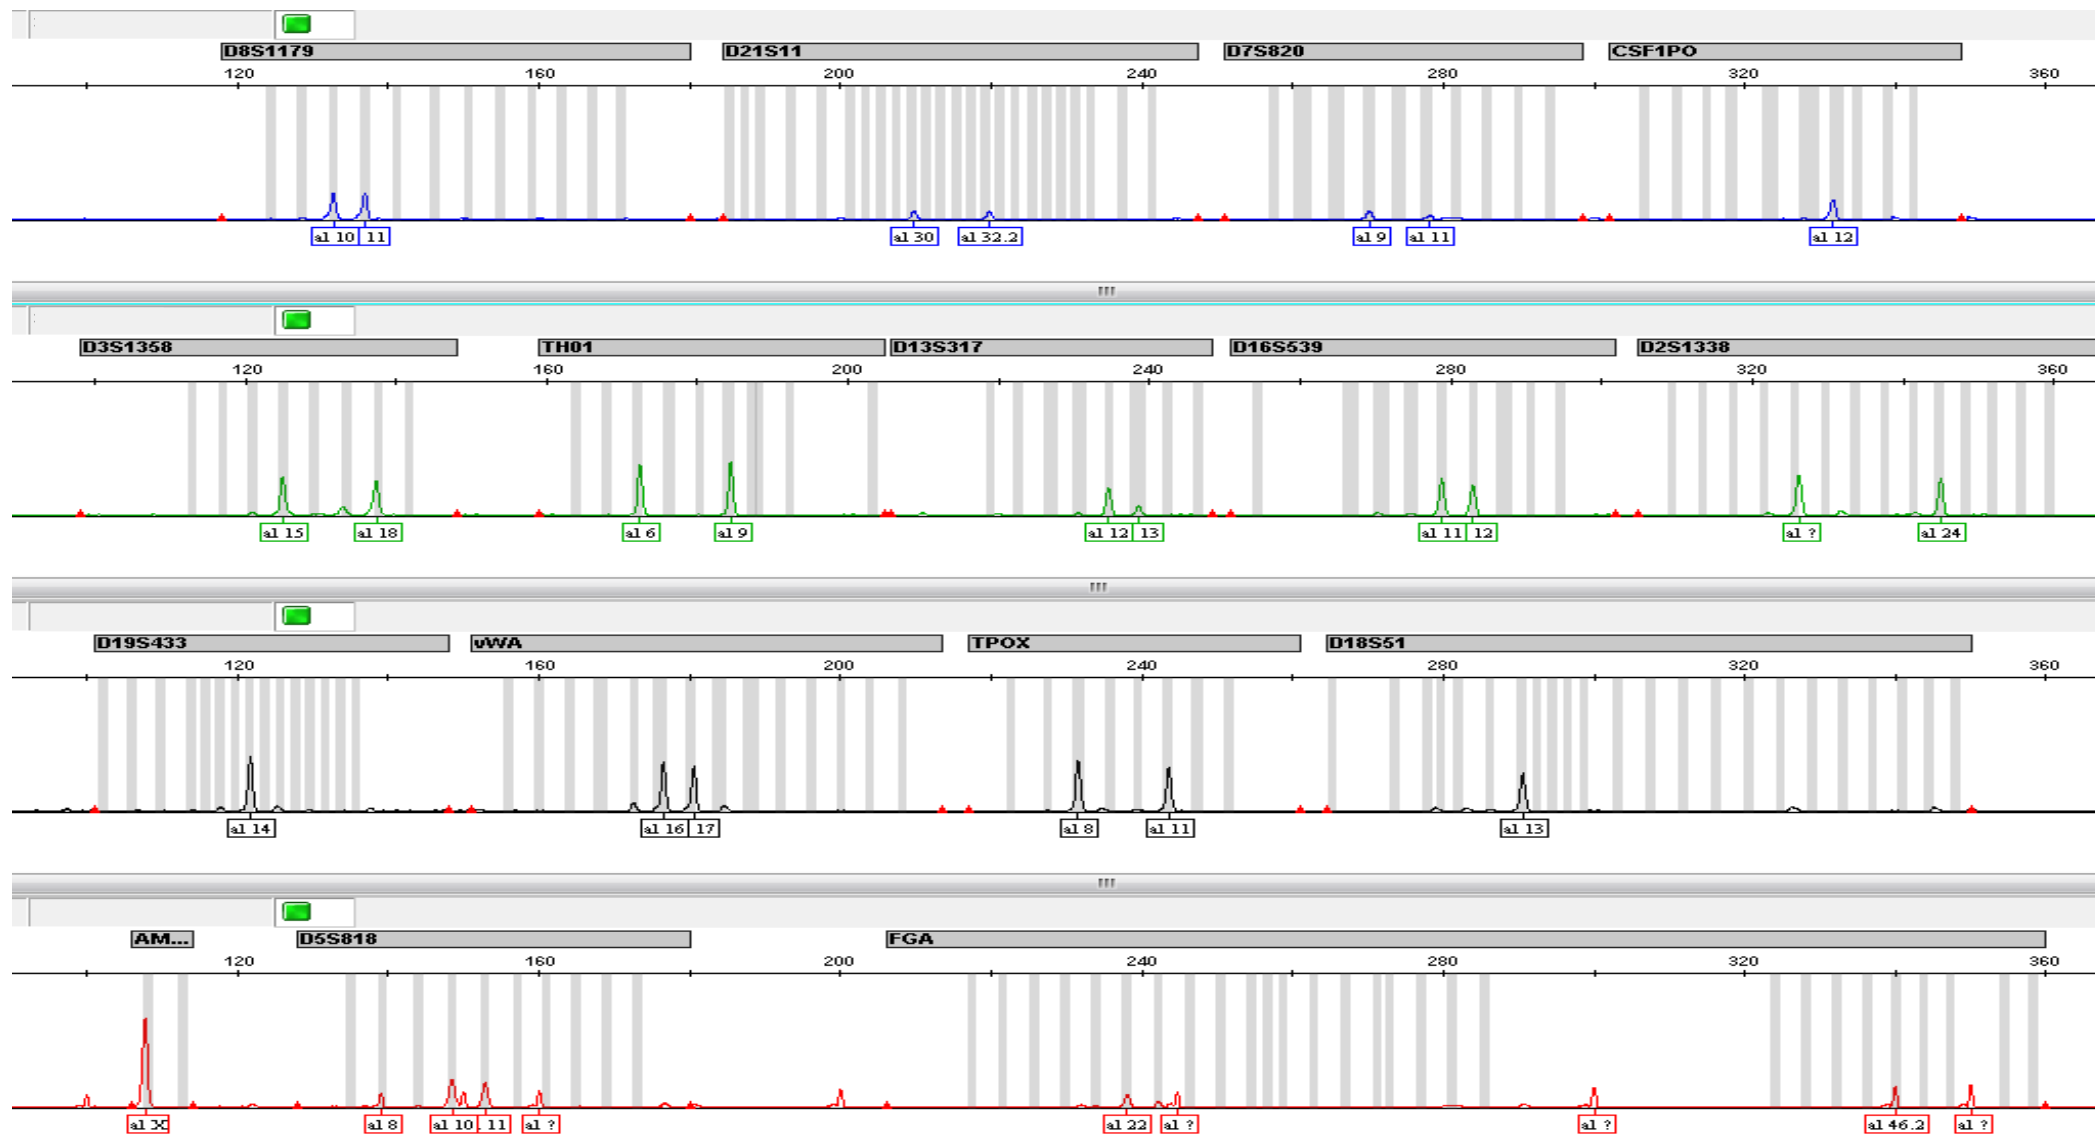



L2975

CELL LINE

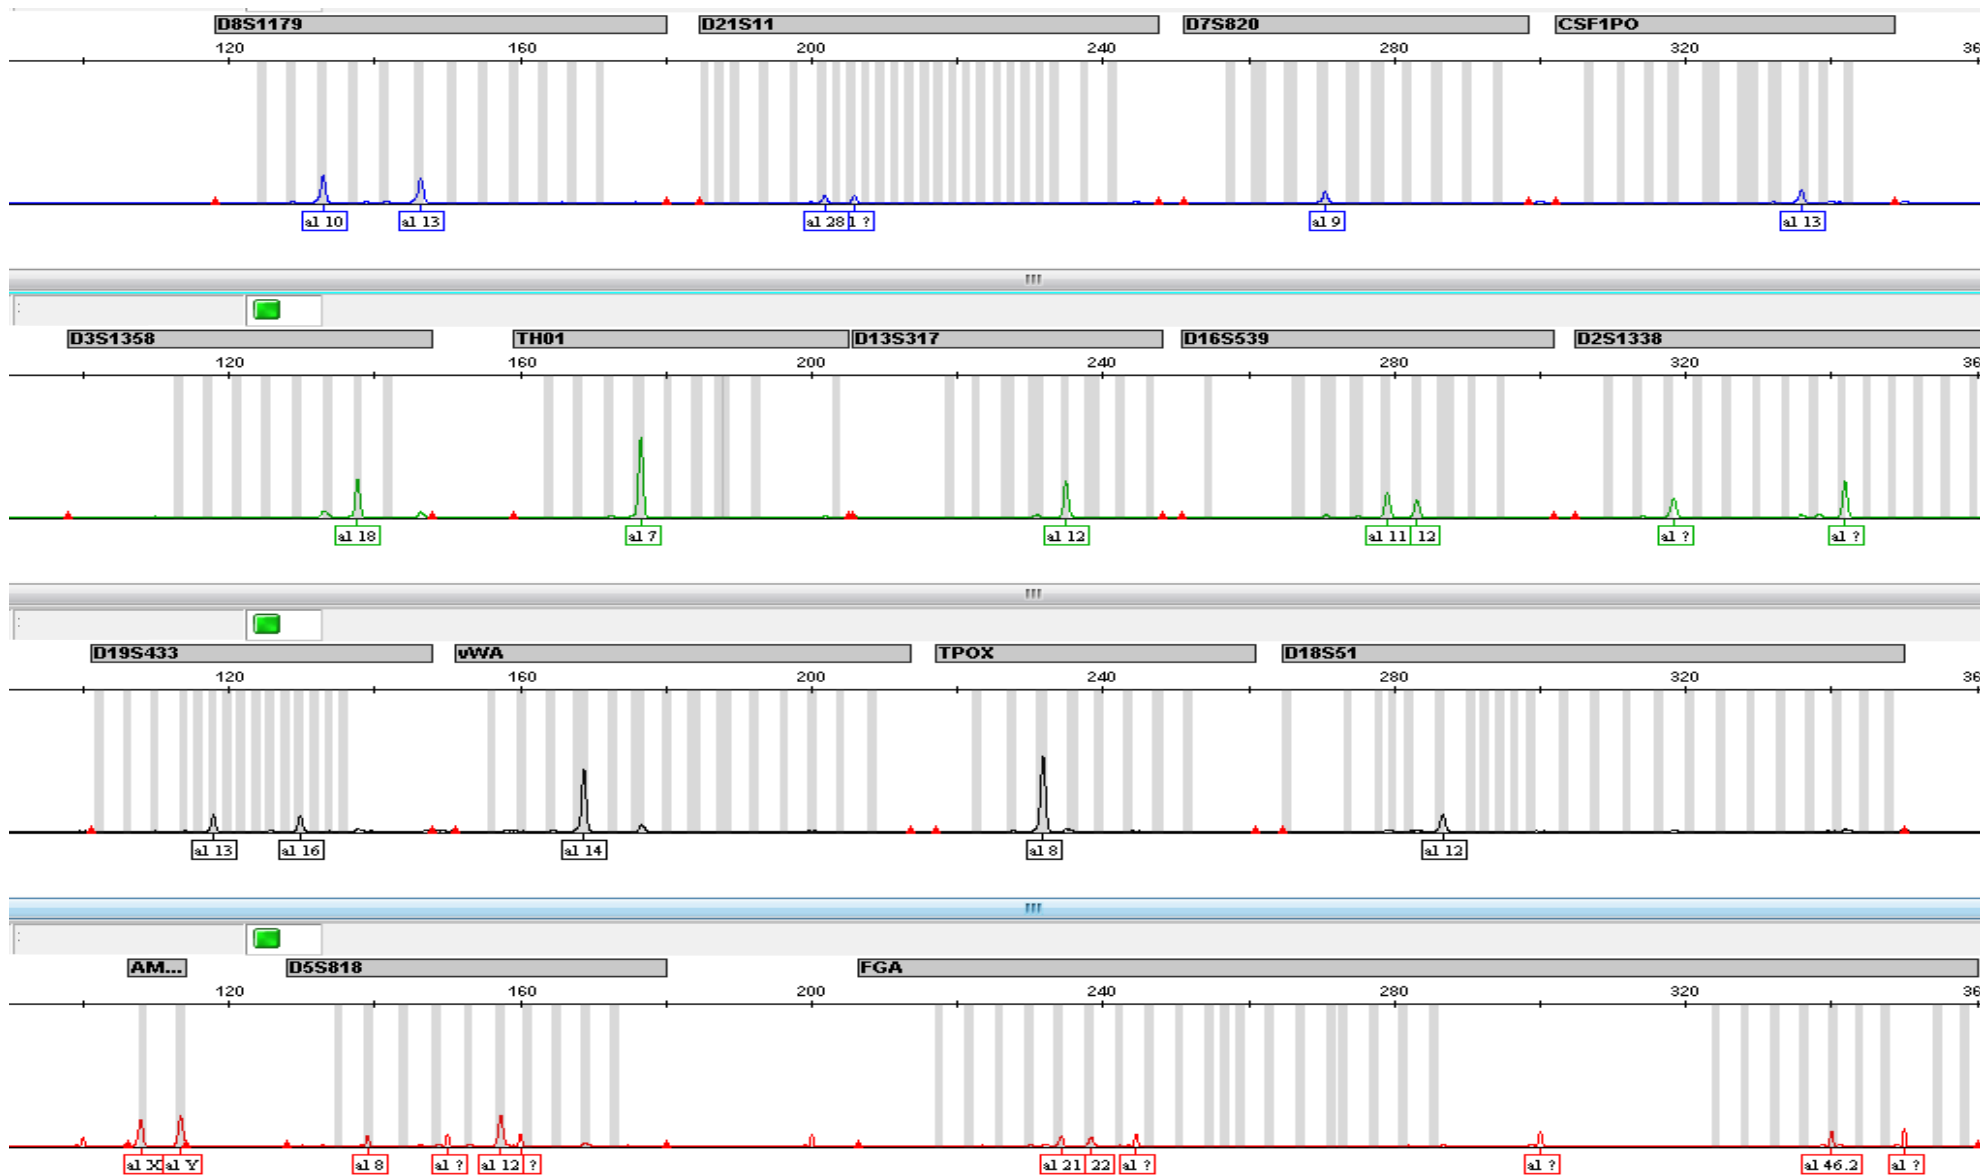

Supplement: mmc1.pdf [file mmc1.pdf]
